# Supplementary material for: Hope for the best …but expect the worst: a qualitative study to explore how women with recurrent miscarriage experience the early waiting period of a new pregnancy
Source: PubMed Central journal article supplement — BMJ Open. 2019 Jun 1;9(5):e029354. doi: 10.1136/bmjopen-2019-029354 (PMC6549705; doi:10.1136/bmjopen-2019-029354), 2019-06-01
Supplement: bmjopen-2019-029354.draft_revisions.pdf [file bmjopen-2019-029354.draft_revisions.pdf]

# BMJ Open

BMJ Open is committed to open peer review. As part of this commitment we make the peer review history of every article we publish publicly available.

When an article is published we post the peer reviewers' comments and the authors' responses online. We also post the versions of the paper that were used during peer review. These are the versions that the peer review comments apply to.

The versions of the paper that follow are the versions that were submitted during the peer review process. They are not the versions of record or the final published versions. They should not be cited or distributed as the published version of this manuscript.

BMJ Open is an open access journal and the full, final, typeset and author-corrected version of record of the manuscript is available on our site with no access controls, subscription charges or pay-per-view fees (<http://bmjopen.bmj.com>).

If you have any questions on BMJ Open's open peer review process please email [info.bmjopen@bmj.com](mailto:info.bmjopen@bmj.com)

# BMJ Open

**Hope for the best ...but expect the worst: A qualitative study to explore how women with recurrent miscarriage experience the early 'waiting period' of a new pregnancy**

|                               |                                                                                                                                                                                                                                                                                                                                                                                                                                                                                                      |
|-------------------------------|------------------------------------------------------------------------------------------------------------------------------------------------------------------------------------------------------------------------------------------------------------------------------------------------------------------------------------------------------------------------------------------------------------------------------------------------------------------------------------------------------|
| Journal:                      | <i>BMJ Open</i>                                                                                                                                                                                                                                                                                                                                                                                                                                                                                      |
| Manuscript ID                 | bmjopen-2019-029354                                                                                                                                                                                                                                                                                                                                                                                                                                                                                  |
| Article Type:                 | Research                                                                                                                                                                                                                                                                                                                                                                                                                                                                                             |
| Date Submitted by the Author: | 28-Jan-2019                                                                                                                                                                                                                                                                                                                                                                                                                                                                                          |
| Complete List of Authors:     | Bailey, Sarah; University of Southampton, Obstetrics and Gynaecology; University Hospital Southampton NHS Foundation Trust<br>Boivin, Jacky; Cardiff University, School of Psychology<br>Cheong, Ying; University of Southampton, Obstetrics and Gynaecology; Complete Fertility Centre, Princess Anne Hospital<br>Kitson-Reynolds, Ellen; University of Southampton, Midwifery<br>Bailey, Christopher; University of Nottingham<br>Macklon, Nick; London Womens Clinic; Zealand University Hospital |
| Keywords:                     | recurrent miscarriage, adaptation, psychological, anxiety, pregnancy                                                                                                                                                                                                                                                                                                                                                                                                                                 |
|                               |                                                                                                                                                                                                                                                                                                                                                                                                                                                                                                      |

SCHOLARONE™  
Manuscripts

1  
2  
3  
4  
5  
6  
7  
8  
9  
10  
11  
12  
13  
14  
15  
16  
17  
18  
19  
20  
21  
22  
23  
24  
25  
26  
27  
28  
29  
30  
31  
32  
33  
34  
35  
36  
37  
38  
39  
40  
41  
42  
43  
44  
45  
46  
47  
48  
49  
50  
51  
52  
53  
54  
55  
56  
57  
58  
59  
60

Hope for the best ...but expect the worst: A qualitative study to explore how women with recurrent miscarriage experience the early 'waiting period' of a new pregnancy

## Authors

1. Dr Sarah Bailey – University Hospitals Southampton NHS Foundation Trust / University of Southampton; [sarahl.bailey@soton.ac.uk](mailto:sarahl.bailey@soton.ac.uk)
2. Professor Jacky Boivin – University of Cardiff; [boivin@cardiff.ac.uk](mailto:boivin@cardiff.ac.uk)
3. Professor Ying Cheong – Director Complete Fertility Centre Southampton / University of Southampton; [y.cheong@soton.ac.uk](mailto:y.cheong@soton.ac.uk)
4. Dr Ellen Kitson-Reynolds – University of Southampton; [e.l.kitson-reynolds@soton.ac.uk](mailto:e.l.kitson-reynolds@soton.ac.uk)
5. Dr Chris Bailey – Honorary Ass. Professor University of Nottingham; [drcbailey@btinternet.com](mailto:drcbailey@btinternet.com)
6. Professor Nick Macklon – The London Women's Clinic; [nick.macklon@londonwomensclinic.com](mailto:nick.macklon@londonwomensclinic.com)

## Correspondence to:

Dr Sarah Bailey;

[sarahl.bailey@soton.ac.uk](mailto:sarahl.bailey@soton.ac.uk)

## Word count:

4190 (excluding title page, references, figures and acknowledgements)

## Key words:

Recurrent miscarriage, adaptation psychological, anxiety, pregnancy

## Abstract

*Objective:* To investigate how women experience the initial period of a new pregnancy after suffering recurrent miscarriage.

*Design:* A qualitative study, nested within a randomised controlled feasibility study of a coping intervention for recurrent miscarriage, used semi-structured face-to-face interviews. Interviews were audio-recorded, transcribed verbatim and analyzed utilizing a thematic network approach.

*Setting:* Participants were recruited from the Recurrent Miscarriage Clinic and Early Pregnancy Unit in two tertiary referral hospitals in the United Kingdom.

*Participants:* 14 women with recurrent miscarriages and who had previously participated in the RCT feasibility component of the study, were recruited.

*Results:* Seven organising themes emerged from the data: (1) turmoil of emotions; (2) preparing for the worst; (3) setting of personal milestones; (4) hypervigilance; (5) social isolation; (6) adoption of pragmatic approaches; (7) need for professional affirmation.

*Conclusions:* The study established that for women with a history of recurrent miscarriage, the waiting period of a new pregnancy is a traumatic time of great uncertainty and emotional turmoil and one in which they express a need for emotional support. Consideration should be given to the manner in which supportive care is best delivered within the constraints of current health service provision.

*Trial registration:* This study is registered with the ISCTRN registry. Registration number: ISRCTN43571276

### Strengths and limitations of this study

- This qualitative study addresses a gap in the literature, providing new and detailed data on how women experience the initial period of a new pregnancy following recurrent miscarriage.
- Qualitative face-to-face interviews enabled the exploration of this sensitive time period, giving participants the opportunity to convey their personal experiences
- While every effort was made to support the recruitment of a diverse sample to this study, the UK setting may limit extrapolation to other national and cultural contexts.

- The purposive sampling strategy enabled an inclusive approach to data collection from the ethnicities represented in the main feasibility study sample.

## Introduction

Miscarriage is the most common adverse outcome of pregnancy<sup>1</sup> and recurrent miscarriage (RM), defined as the loss of three or more consecutive pregnancies, affects approximately 2% of all women trying to conceive<sup>2</sup>. This repeated and unintentional loss of pregnancy has been described as a distinct disease entity<sup>3-5</sup> given that the observed incidence of RM is much higher than would be expected to occur by chance alone. The recently published guidance from European Society of Human Reproduction and Embryology (ESHRE) on the recommended treatment and investigation of recurrent miscarriage highlights the lack of evidence based investigations and treatments available for this condition<sup>2</sup>. Consistent with other guidelines<sup>6</sup> it highlights the need to ensure care is tailored to the psychological needs of couples. Whilst the loss of any desired pregnancy ending in miscarriage is a profound and negative life event, recurrent miscarriage represents an extremely distressing condition that can be both physically and emotionally traumatising. The repetitive nature of recurrent pregnancy loss may intensify the grief and distress experienced, delivering a significant emotional impact on those affected<sup>2</sup>. The experience can evoke intense feelings surrounding a lost baby, a lost future child and a lost motherhood<sup>7</sup>.

Numerous studies have investigated emotional morbidity in women in the time period immediately following miscarriage<sup>8-10</sup> and a more recent study concluded that increased levels of psychological distress and major depression are significantly more common among women with recurrent miscarriage compared to women trying to achieve pregnancy who had not experienced this<sup>11</sup>. Furthermore, previous studies, investigating emotional morbidity in women with recurrent pregnancy loss, have indicated that increased levels of anxiety and depression are often experienced throughout subsequent pregnancies<sup>12 13</sup>.

The early stages of a new pregnancy when confirmation by ultrasound scan of an ongoing and viable pregnancy is awaited, represent a particularly challenging and difficult time-period for women affected by RM. However, published research data assessing the psychological morbidity associated with the difficult waiting period of a new pregnancy is scarce. One study has suggested that instead of experiencing this period as a time of 'joyful anticipation,' couples who have previously experienced recurrent pregnancy loss frequently experience increased levels of anxiety and worry<sup>14</sup>.

The limited data available make it difficult to promote and target the development of therapeutic support for women with RM during the early waiting stages of a new pregnancy. To improve psychological wellbeing during this challenging time, there is a need to develop a deeper and more extensive understanding of lived experiences.

1  
2  
3  
4  
5 This study had two main aims. The first was to explore in-depth women's subjective  
6 experiences of the study intervention and research methods used in the randomised  
7 controlled trial (RCT) for feasibility purposes and the second investigated the lived  
8 experience of women with repeated pregnancy loss during the early 'waiting' stages of a  
9 new pregnancy. This paper presents the findings from this second element of the study  
10 aims.  
11  
12  
13  
14  
15

## 16 Methods

### 17 Design

18 This qualitative study was nested within a two-centre RCT feasibility study of a novel self-  
19 help intervention designed to support women with a history of RM coping with the waiting  
20 period before confirmation of a new ongoing pregnancy<sup>15</sup>. The Positive Reappraisal Coping  
21 Intervention (PRCI)<sup>16</sup> is aimed at building coping resources to improve psychological well-  
22 being during the waiting period of a new pregnancy following RM. Figure 1 illustrates the  
23 context of the present study within the design of the feasibility RCT.  
24  
25  
26  
27  
28  
29

### 30 Patient and Public Involvement

31 A Patient and Public Involvement (PPI) advisory group supported this research and met on a  
32 regular basis for the duration of this study. The group were involved with the design of the  
33 study and commented on any potential burden of participating in the study from a patient's  
34 perspective. The group were involved with data interpretation, and at the end of the study  
35 commented on the findings and contributed to the dissemination plan.  
36  
37  
38  
39

### 40 Participants

41 The study population consisted of patients attending the Recurrent Miscarriage Clinic and  
42 the Early Pregnancy Unit in two tertiary referral hospitals in the South of England.  
43  
44

45 Between February 2014 and May 2016, 107 eligible women were invited to take part in the  
46 main feasibility RCT component of the study and 75 of these agreed to participate. In total  
47 47 women were randomised at the point of a positive pregnancy test to either the  
48 intervention (n=24) or control (n=23) arm of the study. Participants became eligible to take  
49 part in the qualitative part of the study once they had completed the initial RCT component.  
50 This included participants who had reached twelve weeks of pregnancy and those who had  
51 unfortunately experienced a further miscarriage. Care was taken to allow a suitable time-  
52 period to elapse before participants were approached and invited to take part in an  
53 interview following a miscarriage. The aim of sampling was to collect perspectives from as  
54 diverse a group as possible. Selection characteristics considered in the purposive sampling  
55 strategy included study group in the RCT (control or intervention), ongoing pregnancy or  
56  
57  
58  
59  
60

1  
2  
3 miscarriage, ethnicity of participant, education level of participant and clinically important  
4 demographics such as age, comorbidity/medical conditions and previous live births. Of the  
5 15 participants invited to take part in the qualitative element of the study, only one declined  
6 participation. Figure 2 illustrates the key demographic information of study participants  
7  
8  
9

## 10 Data Collection

11 Data were collected face-to-face, during semi-structured interviews and took place at a  
12 convenient time and place for the participant. Recruitment was stopped when data  
13 saturation was achieved. All participants signed a consent form and were interviewed on an  
14 individual basis by the primary author. A topic guide was utilised to steer the general  
15 direction of the data collection, but participants were encouraged to speak freely about  
16 their perceptions and experiences of the waiting period of a new pregnancy. The interviews  
17 lasted between thirty and sixty minutes and were audio recorded then transcribed  
18 verbatim.  
19  
20  
21  
22

## 23 Analysis

24 Evidence of reliability and validity in qualitative research methods is important to ensure the  
25 process of analysis is clear, transparent and trustworthy<sup>17</sup>. 'Thematic Network Analysis'<sup>18</sup>  
26 was used as an analytic tool in this study to provide a robust and highly sensitive means of  
27 supporting thematic analysis and it facilitated an open and systematic approach. This  
28 method of analysis enabled the development of thematic networks that summarised the  
29 main themes apparent in the interview transcripts. The method simply provided a technique  
30 for breaking up the text into 'Basic Themes' (the most basic theme or lowest order theme),  
31 'Organising Themes' (a middle-order theme that organises the Basic Themes into clusters of  
32 similar issues) and 'Global Themes' (which are macro themes that summarise and make  
33 sense of the clusters of lower-order themes). Figure 3 illustrates how transcribed data from  
34 this study were developed from basic themes into a single global theme.  
35  
36  
37  
38  
39  
40

41 Thematic network analysis shares the key features of any hermeneutic analysis and is not a  
42 new method of analysis. However, the use of its web-like network as an organising principle  
43 and representational means, helped to make explicit the procedures utilised in moving from  
44 text to interpretation of data<sup>18</sup>.  
45  
46  
47

48 Transparency of data analysis was aided by the use of field notes and memos and by  
49 discussing the emerging themes with co-authors proficient in qualitative research analysis.  
50 Finally, basic and organising themes were grouped and refined following further analysis  
51 and discussion with co-authors.  
52  
53

## 54 Results

55 Analysis of the data identified seven 'Organising Themes.' These themes form the basis for  
56 the presentation of the results of this qualitative study.  
57  
58  
59  
60

## Organising Theme 1: Turmoil of emotions

The organising theme of 'turmoil of emotions' brings together the numerous reactions and feelings experienced by women with RM during the early stages of a new pregnancy while they are waiting for confirmation by ultrasound scan that it is ongoing. As outlined in Box 1, the women experienced a plethora of emotions whereby any initial excitement caused by the positive pregnancy test was quickly over-taken, by worry and fear that they would miscarry again. The uncertainty of this situation appeared to compound the experience and the women's distress as they continually ruminated upon the outcome of their pregnancy.

All of the interviewees provided extremely powerful examples of the turmoil of emotions they had experienced during the waiting period with the majority of participants referring to the significant levels of anxiety and worry they experienced during this time. This was often overwhelming for them, affecting every aspect of their life and an emotion they were unable to escape from or forget. Accompanying the extremes levels of anxiety and the worry, several of the interviewees described emotions of fear and even terror at the situation they were in and the potential outcome of their pregnancy.

A number of participants remarked that a further notable emotion present throughout the waiting period was guilt, with the women blaming themselves entirely for their miscarriages. They spent time contemplating the lifestyle choices they had made in the past (for example previous smoking/alcohol consumption or previous terminations of pregnancy), but they also felt guilty for letting down their partner and family at their inability to have a successful pregnancy.

Participants commonly expressed their shame at experiencing the emotions of jealousy and envy when they encountered other pregnant women or those with small babies, acknowledging the negative connotations of this emotion. They were, however, keen to point out that it was not a personal thing against the pregnant woman or new mother, rather that they wished it was them in that situation.

### BOX 1

*Sometimes you will be happy, sometimes you will be sad, sometimes you will be angry. To me it always feels like a fire has been put out inside you, so you can smile, do whatever you want to, but your eyes just feel blank - Participant 6 (4 miscarriages)*

*Because of how anxious I was, it was affecting everything. I was really anxious. I wasn't sleeping properly, you worry about everything you eat, everything you drink. You just criticize and analyse everything you do all day long, all night long ... Being anxious makes you anxious so it's a real vicious circle - Participant 8 (3 miscarriages)*

*The more you know what can go wrong, it becomes even more frightening ... It is terrifying really, literally terrifying and that is how I feel - Participant 7 (4 miscarriages)*

## Organising Theme 2: Preparing for the worst



This organising theme conveys the emotional strategies utilised by the women to try to remain emotionally detached from the pregnancy, keeping themselves 'in check' because they did not want to let themselves become excited about the pregnancy (as outlined in Box 2).

A positive pregnancy test was met with feelings of anxiety, trepidation and negativity. It was a moment of realisation and the women described this as being back on the 'rollercoaster' of pregnancy and its associated worry. Women were reluctant to share news of the pregnancy with family and friends because they were certain another miscarriage would occur. Interviewees also suggested that they suppressed any hope of a successful pregnancy and avoided thinking about a future with their unborn child. This appeared to be linked to a notion of self-preservation/protection. By attempting to prepare for the worst outcome (i.e. a further miscarriage) they would be less upset if another miscarriage occurred.

#### BOX 2

*It's the not knowing and it's the being unable to believe anything except the worst. I find I'm baffled by how pregnancies work these days, I'm kind of constantly surprised that people are having babies because my experience is so different ... so now it's impossible to believe that it's going to be okay... I just came to the conclusion that the kindest thing I could do for myself was not to hope. The most likely outcome is that you are not going to have that addition to your family and so actually there's no point picturing what life is going to be like because picturing it is exciting and it's hoping for a future that probably isn't going to be there. Hope just feels utterly naive now - Participant 13 (4 miscarriages)*

*I was very detached from the whole pregnancy ...it was self-preservation kind of mode - Participant 11 (4 miscarriages)*

*I think it's a self-preservation because of what you've been through, but I was never like that with my daughter. It's a learnt behaviour definitely ... it's almost like you can't let yourself dream this might happen after wanting it so long – Participant 10 (3 miscarriages)*

*I think me and my husband ended up trying not to think about it too much ... you don't want to get your hopes up so we'd be very cautious about even really talking about the positives in case it was bad news – Participant 14 (3 miscarriages)*

*I need to be real and I prepare for the worst, but hope for the best and that's almost like a protective shield around me – Participant 8 (3 miscarriages)*

### Organising Theme 3: Setting of Personal milestones

The interviewees placed huge importance on the need to attain personal milestones, using this as a method of navigating their way through the uncertainty of the waiting period (Box 3). This was frequently achieved by breaking the pregnancy up in to smaller time chunks, thinking of the first trimester in individual weeks, or even days, rather than as a whole period of time. In addition, the participants frequently recalled how they tried to live the early stages of a new pregnancy day-by-day, trying not to think too far ahead, living in the moment.

The women's personal milestones often consisted of reaching and going past the gestation of their previous miscarriages, or achieving midwife or scan appointments.

During the interviews, participants were asked if anything had helped them cope with the waiting period and everyone referred to the value of reassurance from ultrasound scans and

1  
2  
3 how they broke up this time into more manageable time chunks. Interestingly, however, all  
4 women commented that any optimism they felt after a positive scan was short-lived and  
5 feelings of anxiety soon started to re-emerge.  
6  
7  
8  
9  
10  
11  
12  
13  
14  
15

16  
17 **BOX 3**

18 *It's one day at a time, that's how we live one day at a time and that's how we've lived since June and I don't think it's a bad*  
19 *thing because we are appreciating that emotions can change from day to day ...rather than think about the birth we think*  
20 *about little hurdles ... I try not to think too far ahead because I get overwhelmed with things – Participant 12 (3*  
21 *miscarriages)*

22  
23 *It's kind of like you are trying to climb a ladder and the first rung up is the twelve week scan, but at least if you have a seven*  
24 *week scan and things are okay then you can stand on that rung and you know you've got that far - Participant 13 (4*  
25 *miscarriages)*

26  
27 *As soon as I confirmed the pregnancy they told me that they would get me in for scans at 6,8 and 10 weeks which helps*  
28 *because you've then got a 2 week marker to break up the 12 weeks. But I would say the anxiety massively increases up*  
29 *towards the scan ... it build, builds, builds and then you have a scan and it drops so by the time I would go to a scan,*  
30 *especially the 6 week scan I was a complete mess and really struggling to hold it together, crying a lot and incredibly*  
31 *nervous, body full of adrenaline and really, really anxious - Participant 3 (6 miscarriages)*  
32  
33

34 **Organising Theme 4: Hypervigilance**

35 Study participants frequently reported using observing strategies and hypervigilance to help  
36 them monitor their pregnancy symptoms, considering symptoms such as nausea, tiredness  
37 and breast tenderness as signs of an ongoing pregnancy (Box 4). Many of the participants  
38 detailed checking as an obsession and something they could not help doing, wanting  
39 constantly to seek reassurance that their pregnancy was ongoing.  
40  
41  
42

43 One of the most common early signs of miscarriage is the onset of vaginal bleeding or  
44 spotting. Many were so convinced that they were going to experience a further miscarriage  
45 that they frequently reported repeated visits to the toilet to check for the onset of vaginal  
46 bleeding. This could often amount to numerous toilet visits every hour.  
47  
48

49 Participants expressed that when pregnancy symptoms were more intense then they felt  
50 more certain of an ongoing pregnancy, however any fluctuation in symptoms increased  
51 their feelings of uncertainty and caused added emotional distress.  
52  
53  
54  
55

56 **BOX 4**

57 *Knicker checking is a big obsession - Participant 5 (4 miscarriages)*  
58  
59  
60

*You are constantly monitoring your pregnancy symptoms, constantly. Do I feel the same as I did yesterday, are my 'boobs' still sore, do I need to go to the toilet more often or am I just drinking more? And you are constantly questioning every single twinge you feel and you are dying to get morning sickness so that you know you are pregnant – it's just all consuming - Participant 3 (6 miscarriages)*

*I was just constantly nauseous and if I wasn't thinking about it I probably wouldn't have realised that I was nauseous, because it wasn't that bad. But I felt myself thinking about it and I wanted to feel that feeling sickness just so I know that something is happening. Until now every single time I go to the bathroom I have to check that I'm not bleeding and I've been doing it since the beginning of my pregnancy. I also spent quite a bit of money on pregnancy tests just to see ... I did them almost everyday, but I couldn't help it - Participant 9 (3 miscarriages)*

## Organising Theme 5: Social isolation

This organising theme brings together the participants' views on social interaction during the waiting period (Box 5). Many reported that they felt isolated and lonely during this time. This was compounded by the fact that the women often isolated themselves from friends and family, reluctant to share the news of their pregnancy because they felt certain a further miscarriage would occur, therefore, there was no point in telling people. There was also an innate fear for several participants that sharing the news of their pregnancy in the early stages pregnancy would tempt fate and as a result, they would experience a further miscarriage.

There appeared to be a general withdrawal from social situations and social media, mainly due to the fear of forced social interaction with other pregnant women or those announcing news of a pregnancy. Compounding the degree of isolation was the fact that the women also appeared to feel safer and protected at home as they felt this environment might reduce the risk of miscarriage.

### BOX 5

*You want to tell people of course you do, but it makes you very private, very keep yourself to yourself - Participant 12 (3 miscarriages)*

*It's really difficult I think these days with Facebook, it's really hard. I had to block a few people who put scan photos up or bump pictures. I found bump photos really hard because you think am I ever going to get there? Is that ever going to be me? - Participant 3 (6 miscarriages)*

*I've never been so scared to go outside my front door because I might just bump in to someone who is pregnant. Pregnancy just seemed to be everywhere. It's just one of those things where you become really heightened to it ... and it was just awful, absolutely awful - Participant 8 (3 miscarriages)*

*I didn't want to speak to anybody, I didn't want to face anybody – Participant 9 (3 miscarriages)*

## Organising Theme 6: Adoption of pragmatic approaches

This organising theme brings together some of the pragmatic and practical approaches participants utilised to try to manage the stress and uncertainty of the waiting period (Box

1  
2  
3 6). The women referred to the fact that these practical approaches appeared to give them  
4 back some control in a situation where they had none.  
5

6 Pragmatic approaches to coping with the anxiety often consisted of simple distraction  
7 techniques and keeping busy. This was particularly evident in participants who already had  
8 children, however work often provided a big distraction for employed participants. Other  
9 participants used avoidance (namely not allowing themselves to think about the pregnancy  
10 and blocking it out of their thought processes).  
11  
12  
13

14 Commonly, the women tried to adapt their lifestyle to eliminate factors they felt could  
15 increase the risk of miscarriage such as reducing strenuous exercise or improving nutritional  
16 intake. Lifestyle adaptations could be more extreme with women giving examples of never  
17 opening the window on a car journey to avoid pollution from other cars or avoiding taking  
18 baths or showers in pregnancy.  
19  
20  
21

22 Many of the participants referred to the value of accessing peer support as one of the most  
23 useful practical approaches they could adopt during this time. They believed only women  
24 who had experienced their situation truly understood the anxieties and challenges they  
25 faced. In most cases peer support was accessed via on-line miscarriage support groups and  
26 forums.  
27  
28  
29  
30

#### 31 BOX 6

32 *The only thing that would help is my work ... It took my mind away so I didn't have time to think or dwell on think, so I think*  
33 *that was helpful - Participant 1 – (3 miscarriages)*

34 *I couldn't just dwell in my own self-pity about how hard it all was. So yes distraction did help, so if work hadn't given me*  
35 *distraction I would have gone and sought it. What made it better? Trying to be grateful, being distracted, really seriously*  
36 *just trying not to think about it - Participants 13 (4 miscarriages)*

37 *You stop more and more things. So you'll stop doing extra work, you'll start relaxing more. You'll stop doing some parts of*  
38 *your exercise, you'll stop eating different foods. You go through the most illogical things in your head – if I stay calm it will*  
39 *be alright, if I just do walking it will be fine - Participant 6 (4 miscarriages)*  
40  
41  
42  
43  
44

### 45 Organising Theme 7: Need for professional affirmation

46  
47  
48 In the final organising theme, interviewees described the need for health professionals'  
49 acknowledgement of the challenges they faced and the stress they experienced during the  
50 waiting period of a new pregnancy (Box 7).  
51  
52

53 A recurrent theme in the interviews was a sense that health service provision was both  
54 limited and unsupportive and the women felt that this demonstrated a lack of  
55 understanding of their needs during this testing time. Often the first health professional the  
56 woman accessed for support was their General Practitioner (GP). Whilst the degree of  
57 support offered by individual GPs varied, interviewees frequently spoke of the lack of  
58  
59  
60

1  
2  
3 support and understanding shown by them. Lack of empathy was considered one of the  
4 most upsetting aspects of their situation. All participants expressed the need to be cared for  
5 in a sensitive and understanding manner.  
6  
7

8 When an individual did receive empathetic care from a health professional, whether that  
9 was a GP or a nurse working in the Early Pregnancy Unit, then it made a positive difference  
10 to their emotional well-being.  
11  
12  
13  
14  
15  
16  
17  
18

19 **BOX 7**

20  
21 *There is sometimes an absolute lack of understanding....I think generally the thing I would say to medical professionals is*  
22 *that they need to acknowledge that this person is probably going to be slightly damaged. Massive things don't have to*  
23 *change just some realisation of what a new pregnancy means to a woman who has been through all those lost pregnancies*  
24 *- Participant 10 (3 miscarriages)*

25  
26 *It's the whole if you've got no pain and you've got no blood you are fine, that's what the GP would say - Participant 7 (4*  
27 *miscarriages)*

28  
29 *The EPU (Early Pregnancy Unit) staff were more gutted than I was I think, they were lovely... they were all just rooting for*  
30 *me and it was really nice - Participant 13 (4 miscarriages)*  
31

32  
33 **Discussion**  
34  
35  
36

37 Awaiting confirmation of an ongoing, viable pregnancy after having experienced recurrent  
38 miscarriage is a traumatic period marked by an intense struggle between hope and despair,  
39 hypervigilance of pregnancy symptoms and bracing for another miscarriage all occurring in a  
40 context of social isolation and feeling relatively unsupported by health professionals.  
41

42 Nevertheless, women were shown to adopt diverse coping strategies aimed at achieving a  
43 state of cautious optimism that served to maintain hope while bracing for the possibility of  
44 failure.  
45  
46

47 The findings from this study provide further evidence that there is a need for provision of  
48 psychological support to women during the difficult waiting period of a new pregnancy  
49 following recurrent miscarriage. It also offers new and previously unexplored insights in to  
50 how women experience this challenging time.  
51  
52

53 The global theme identified in this study was that waiting is traumatic and a time in which  
54 the women hope for the best, but expect the worst. This global theme supports and  
55 expands on those reported by others. Previous research has demonstrated that women with  
56 a past history of repeated pregnancy losses utilise coping strategies to 'brace for the future,'  
57 as a means of attempting to control their emotions and future emotions as much as possible  
58  
59  
60

1  
2  
3 to prepare for the worst outcome<sup>19</sup>. This involved anticipating the negative feelings that a  
4 further miscarriage would cause and utilising bracing strategies such as not allowing  
5 themselves to think about a future with their unborn child and attempting to remain  
6 emotionally detached from the pregnancy. Behaviours similar to 'bracing for the worst'<sup>19</sup>  
7 have been reported in other studies that investigated pregnancy after previous perinatal  
8 loss, including 'holding back emotions'<sup>20</sup> and 'emotional cushioning'<sup>21</sup> which involves  
9 'compartmentalising the pregnancy and avoiding its emotional aspects for as long as  
10 possible'<sup>21</sup>. The compelling evidence from this study provides further evidence of bracing  
11 adding to suggestions from previous studies<sup>19</sup> that propose the need for further research to  
12 investigate the impact of bracing strategies on long-term bonding and attachment between  
13 child and parents.  
14  
15  
16  
17  
18

19 All participants concurred that the uncertainty of the situation compounded their emotional  
20 upset. The uncontrollability and unpredictability of the waiting period seemed a particularly  
21 difficult aspect for them to cope with. The formative work of Lazarus and Folkman<sup>22</sup>  
22 examined the processes of stress, appraisal and coping and identified the fact that both a  
23 lack of control over a situation and an inability to predict its outcome are potential stress  
24 inducing factors. If the demands of a situation exceed the level of coping resources available  
25 to the person then the affected individual is likely to experience stress, namely psychological  
26 (e.g. anxiety, worry), physiological (e.g. racing heart, tension) and behavioural responses  
27 (e.g. insomnia) responses<sup>22</sup>. The participants in this study consistently commented that the  
28 uncertainty of the waiting period was itself a stressor eliciting emotional turmoil, some even  
29 commenting on the relief they felt when a further miscarriage occurred as they felt better  
30 able to cope with the grief of miscarriage than the uncertainty of the waiting period.  
31 Positive reappraisal coping has been shown to be useful and valuable coping strategy and a  
32 helpful tool to help sustain coping during periods of uncertainty<sup>23 24</sup>. This type of coping  
33 might provide some respite from the prolonged and unrelenting stress that women with  
34 recurrent miscarriage experience during the early stages of a new pregnancy and help to  
35 sustain their ability to cope during this challenging time. The RCT component of this study  
36 has investigated the use of a novel self-help coping intervention, the Positive Reappraisal  
37 Coping Intervention<sup>16</sup>. Findings from this component of the study will be reported  
38 separately. Further research is planned to explore the role of the Positive Reappraisal  
39 Coping Intervention and how it appears to generate resilience in its users.  
40  
41  
42  
43  
44  
45  
46  
47  
48

49 One organising theme described the strong 'need for professional affirmation' and  
50 perceptions of the level of care patients would like to receive. In a pioneering piece of work  
51 Bradshaw<sup>25</sup> presented a taxonomy of social need in which he acknowledged that the  
52 concept of need was both complex and imprecise. Furthermore he emphasised the fact that  
53 need was relative and therefore needs identified by professional experts often differed from  
54 those felt by the individual. Certainly, a recurrent theme during the interviews was a sense  
55 that current health service provision for women with recurrent miscarriage during the  
56 waiting period of a new pregnancy was both limited and unsupportive. Participants felt  
57  
58  
59  
60

1  
2  
3 these gaps in support demonstrated a lack of understanding of their needs during this  
4 challenging time. The need for professional support and reassurance was generated at the  
5 actual moment of realisation that they were pregnant again, following the positive  
6 pregnancy test and in general was experienced toward the first health professional they  
7 would contact for support and advice (i.e. their GP). Whilst the degree of support offered by  
8 GPs varied individually, many women spoke of their disappointment at the lack of  
9 understanding and compassion shown to them. There was a general feeling that any health  
10 professional interaction that took place within a dedicated Early Pregnancy Unit  
11 environment was more sensitive to their needs, but that there was still room for  
12 improvement.  
13  
14  
15  
16  
17

18 Whilst this study builds on the results of other studies that have identified the importance  
19 of understanding and compassion from health professionals around the time of miscarriage  
20 <sup>26 27</sup>, it specifically highlights the need for health professional support during the early stages  
21 of a new pregnancy following recurrent miscarriage.  
22  
23

24 Clearly, consideration needs to be given to the most effective and appropriate ways in  
25 which health professionals can meet this demand for support, given the limited time  
26 constraints within which they work. GPs have time-limited consultations, often of less than  
27 ten minutes per patient and similarly secondary care health professionals work within  
28 restricted clinic appointment times. It is not always feasible to address every aspect of the  
29 woman's psychological needs during this time. For example, some women with recurrent  
30 miscarriage would prefer at least weekly reassurance ultrasound scans and others individual  
31 regular counselling sessions. However, the data from this study highlighted that in all cases,  
32 there was a sense amongst participants of the need to raise awareness within the health  
33 professional community of the potential emotional impact of the waiting period and the  
34 need for empathetic care. The participants acknowledged that they understood that the  
35 involvement of health professionals would not make a difference to the outcome of their  
36 pregnancy. Furthermore the women understood that their emotional needs fluctuated  
37 during the waiting period and therefore it was difficult for GPs and other health  
38 professionals to address these needs specifically. However, similar to the findings of a study  
39 by Musters, et al. <sup>10</sup> that investigated supportive care for women with recurrent miscarriage,  
40 women in this study noted that when health professionals took their emotional concerns  
41 seriously by listening to them and showing them understanding and empathy then it made a  
42 positive difference to their emotional wellbeing. The 'soft' skills of compassion, empathy  
43 and understanding appeared to meet the need for support during the uncertainty of the  
44 waiting period.  
45  
46  
47  
48  
49  
50  
51  
52  
53  
54

55 The main strength of this study is that it addresses a gap in the literature and provides new  
56 and detailed qualitative data on how women experience the initial waiting period of a new  
57 pregnancy following recurrent miscarriage. However, one of the study limitations is that the  
58 majority of participants who took part in this study were of White British ethnicity, mainly  
59  
60

1  
2  
3 due to the study sites in the South of England. A more varied ethnicity sample may have  
4 provided a more diverse and richer insight in to the cultural effects of recurrent miscarriage.

### 6 *Conclusion*

8 This study demonstrates that for many women with recurrent miscarriage, the waiting  
9 period of a new pregnancy is a time of great uncertainty and emotional turmoil and one in  
10 which they are likely to require emotional support.

13 Recurrent pregnancy loss has the potential to cause serious psychological effects including  
14 grief, anxiety and depression, and these emotional symptoms can affect every aspect of the  
15 woman's life. Recurrent miscarriage is therefore much more than just a medical condition;  
16 its consequences are more profound and life changing and the provision of supportive care  
17 should be central to the management of women who experience this distressing and  
18 frustrating condition.

22 This study reveals the thoughts and perceptions of women with a history of recurrent  
23 miscarriage during the waiting period of a new pregnancy; the challenge remains for both  
24 clinicians and service providers to develop a service that meets the needs of these women  
25 given the complex and challenging times that the NHS is experiencing. Recent NHS policy<sup>28</sup>  
26 advocates the need to ensure health services are designed around patients, but on a more  
27 sustainable footing. This includes the use of technology and innovation to enable patients to  
28 take a more active role in their health. The next stage of this programme of research plans  
29 to investigate the potential utilisation of technical innovation strategies as a method of  
30 providing much needed support to this vulnerable patient population.

### 36 *Acknowledgements*

37 The authors would like to thank the women who kindly agreed to participate in this study  
38 and the members of the PPI group for their valuable input into this programme of research.

### 41 *Contributors*

42 SB contributed to the design of the study, was responsible for obtaining ethical approval  
43 and liaised with the PPI group for this study. NM, CB, JB, EKR and YC contributed to the  
44 design of the study. SB and EKR coded and analysed all the transcripts. All authors were  
45 involved in interpretation of the data. SB wrote the first draft of the manuscript and all  
46 authors were involved in subsequent revision. All authors approved the final manuscript.

### 50 *Funding*

51 This study was funded by the National Institute of Health Research, UK (award reference  
52 number CDRF-2012-03-004). The study was sponsored by University Hospital Southampton  
53 NHS Foundation Trust

### 56 *Competing interests*

57 None declared



### *Ethical approval*

A favourable opinion was received from National Research Ethics committee, South Central – Hampshire A (13/SC/0506)

### *Provenance and peer review*

Not commissioned; peer reviewed for ethical and funding approval prior to submission

### *Data sharing statement*

This research is part of a PhD study by SB. The PhD will be available via the University of Southampton depository

### *Figure legend/ captions*

Figure 1 – RCT feasibility study of a coping intervention for recurrent miscarriage

Figure 2 – Demographic information of study participants

Figure 3 – Development of basic, organising and global themes using thematic network analysis

## References

1. Simmons RK, Singh G, Maconochie N, et al. Experience of miscarriage in the UK: Qualitative findings from the National Women's Health Study. *Social Science & Medicine* 2006;**63**:1934-46.
2. ESHRE. Recurrent Pregnancy Loss Guideline of the European Society of Human Reproduction and Embryology, 2017.
3. Rai R, Regan L. Seminar: Recurrent miscarriage. *The Lancet* 2006;**368**:601-11.
4. Christiansen OB, Steffensen R, Nielsen HS, et al. Multifactorial Etiology of Recurrent Miscarriage and Its Scientific and Clinical Implications. 2008.
5. Larsen EC, Christiansen OB, Kolte AM, et al. *New insights into mechanisms behind miscarriage*, 2013.
6. RCOG. the investigation and treatment of couples with recurrent first-trimester and second-trimester miscarriage. 2011.
7. Ockhuijsen HDL, van den Hoogen A, Boivin J, et al. Pregnancy After Miscarriage: Balancing Between Loss of Control and Searching for Control. *Research in Nursing and Health* 2014;**37**(4):267-75.
8. Craig M, Tata P, Regan L. Psychiatric morbidity among patients with recurrent miscarriage. *Journal of Psychosomatic Obstetrics and Gynecology* 2002;**23**(3):157-64.
9. Swanson KM, Chen H, Graham JC, et al. Resolution of depression and grief during the first year after miscarriage: a randomized controlled clinical trial of couples-focused interventions. *Journal of Women's Health* (15409996) 2009;**18**(8):1245-57.

10. Musters AM, Koot YE, van den Boogaard NM, et al. Supportive care for women with recurrent miscarriage: a survey to quantify women's preferences. *Human Reproduction* 2013;**28**(2):398-405.
11. Kolte AM, Olsen LR, Mikkelsen EM, et al. Depression and emotional stress is highly prevalent among women with recurrent pregnancy loss. *Human Reproduction (Oxford, England)* 2015;**30**(4):777-82.
12. Magee PL, MacLeod AK, Tata P, et al. Psychological distress in recurrent miscarriage: the role of prospective thinking and role and goal investment. *Journal of Reproductive & Infant Psychology* 2003;**21**(1):35-47.
13. Lok IH, Neugebauer R. Psychological morbidity following miscarriage. *Best Practice & Research Clinical Obstetrics & Gynaecology* 2007;**21**:229-47.
14. Hutti MH, Armstrong DS, Myers JA, et al. Grief Intensity, Psychological Well-Being, and the Intimate Partner Relationship in the Subsequent Pregnancy after a Perinatal Loss. *JOGNN: Journal of Obstetric, Gynecologic & Neonatal Nursing* 2015;**44**(1):42.
15. Bailey S, Bailey C, Kitson-Reynolds E, et al. A feasibility and acceptability study of a novel self-help coping intervention for recurrent miscarriage, 2015:70-71.
16. Lancaster D, Boivin J. A feasibility study of a brief coping intervention (PRCI) for the waiting period before a pregnancy test during fertility treatment. *Human Reproduction* 2008;**23**(10):2299-307.
17. Amankwaa L. Creating protocols for trustworthiness in qualitative research *Journal of Cultural Diversity* 2016;**23**(3):121-27.
18. Attride-Stirling J. Thematic networks: an analytic tool for qualitative research. *Qualitative Research* 2001;**1**(3):385-405.
19. Ockhuijsen HDL, Boivin J, van den Hoogen A, et al. Coping after recurrent miscarriage: uncertainty and bracing for the worst. *Journal of Family Planning & Reproductive Health Care* 2013;**39**(4):250-56.
20. Côté-Arsenault D, Dombeck MB. Maternal assignment of fetal personhood to a previous pregnancy loss: relationship to anxiety in the current pregnancy. *Health Care for Women International* 2001;**22**(7):649-65.
21. Cote-Arsenault D, Donato K. Emotional cushioning in pregnancy after perinatal loss. *Journal of Reproductive & Infant Psychology* 2011;**29**(1):81-92.
22. Lazarus RS, Folkman S. *Stress, appraisal, and coping / Richard S. Lazarus, Susan Folkman: New York : Springer, 1984., 1984.*
23. Folkman S. Positive psychological states and coping with severe stress. *Social Science & Medicine* 1997;**45**(8):1207-21.
24. Manne S, Ostroff J, Fox K, et al. Cognitive and social processes predicting partner psychological adaptation to early stage breast cancer. *British Journal of Health Psychology* 2009;**14**(1):49-68.
25. Bradshaw J. The concept of social need. In: McClachlan G, ed. *Problems and Progress*. Oxford: Oxford University Press, 1972.
26. Meaney S, Corcoran P, Spillane N, et al. Experience of miscarriage: an interpretive phenomenological analysis. *BMJ Open* 2017;**7**(e011382).
27. Norton W, Furber L. An exploration of how women in the UK perceive the provision of care received in an early pregnancy assessment unit: an interpretive phenomenological analysis. *BMJ open* 2018;**8**(e023579).
28. NHS England. *Next Steps on the NHS Five Year Forward View, 2017.*

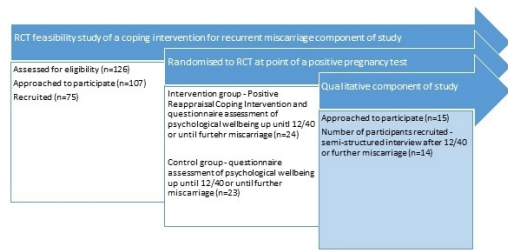

Figure 1 - RCT feasibility study of a coping intervention for recurrent miscarriage

203x114mm (144 x 144 DPI)

| 1. From Basic to Organising to Global Themes           |                                      |                                               |
|--------------------------------------------------------|--------------------------------------|-----------------------------------------------|
| <i>Themes as Basic Themes</i>                          | <i>Organising Themes</i>             | <i>Global Themes</i>                          |
| 1. Uncertainty and fear of unknown                     | 1. Turmoil of emotions               | 1. Hope for the best ... but expect the worst |
| 2. Extreme feelings of anxiety                         |                                      |                                               |
| 3. Betrayed by body - theft of expectations            |                                      |                                               |
| 4. Envy of other pregnant women                        |                                      |                                               |
| 5. Guilt - must be to blame                            |                                      |                                               |
| 6. Increased superstitious tendencies                  |                                      |                                               |
| 7. Mixed emotions after positive pregnancy test        | 2. Preparing for the worst           |                                               |
| 8. Lost expectations                                   |                                      |                                               |
| 9. Lack of hope                                        |                                      |                                               |
| 10. Expecting the worst                                |                                      |                                               |
| 11. Denial of pregnancy                                |                                      |                                               |
| 12. Efforts to remain 'detached' from pregnancy        |                                      |                                               |
| 13. Waiting period divided up into 'bite sized chunks' | 3. Setting of personal milestones    |                                               |
| 14. Take it day-by-day                                 |                                      |                                               |
| 15. Checking for pregnancy symptoms                    | 4. Hypervigilance                    |                                               |
| 16. 'Knicker checking'                                 |                                      |                                               |
| 17. Heightened intuition                               |                                      |                                               |
| 18. Social withdrawal                                  | 5. Social isolation                  |                                               |
| 19. Effect on relationship with family and friends     |                                      |                                               |
| 20. Reluctance to announce news of pregnancy           |                                      |                                               |
| 21. Views on personal social media use                 |                                      |                                               |
| 22. Views on on-line support groups                    |                                      |                                               |
| 23. Value of peer support                              |                                      |                                               |
| 24. Getting used to RM                                 | 6. Adoption of pragmatic approaches  |                                               |
| 25. How to deal with RM                                |                                      |                                               |
| 26. Controlling behaviour                              |                                      |                                               |
| 27. What helped?                                       |                                      |                                               |
| 28. What didn't help?                                  |                                      |                                               |
| 29. Ultra sound scans                                  | 7. Need for professional affirmation |                                               |
| 30. Investigations in to RM                            |                                      |                                               |
| 31. Views on health professionals                      |                                      |                                               |
| 32. Importance of sensitivity of health professionals  |                                      |                                               |

Figure 3 - Development of basic, organising and global themes using thematic network analysis

221x174mm (144 x 144 DPI)

# Reporting checklist for qualitative study.

Based on the SRQR guidelines.

## Instructions to authors

Complete this checklist by entering the page numbers from your manuscript where readers will find each of the items listed below.

Your article may not currently address all the items on the checklist. Please modify your text to include the missing information. If you are certain that an item does not apply, please write "n/a" and provide a short explanation.

Upload your completed checklist as an extra file when you submit to a journal.

In your methods section, say that you used the SRQR reporting guidelines, and cite them as:

O'Brien BC, Harris IB, Beckman TJ, Reed DA, Cook DA. Standards for reporting qualitative research: a synthesis of recommendations. Acad Med. 2014;89(9):1245-1251.

|    | Reporting Item                                                                                                                                                                                                                       | Page Number |
|----|--------------------------------------------------------------------------------------------------------------------------------------------------------------------------------------------------------------------------------------|-------------|
| #1 | Concise description of the nature and topic of the study identifying the study as qualitative or indicating the approach (e.g. ethnography, grounded theory) or data collection methods (e.g. interview, focus group) is recommended | 1           |
| #2 | Summary of the key elements of the study using the abstract format of the intended publication; typically                                                                                                                            | 1           |

1  
2  
3  
4  
5  
6  
7  
8  
9  
10  
11  
12  
13  
14  
15  
16  
17  
18  
19  
20  
21  
22  
23  
24  
25  
26  
27  
28  
29  
30  
31  
32  
33  
34  
35  
36  
37  
38  
39  
40  
41  
42  
43  
44  
45  
46  
47  
48  
49  
50  
51  
52  
53  
54  
55  
56  
57  
58  
59  
60

includes background, purpose, methods, results and conclusions

|                                            |    |                                                                                                                                                                                                                                                                                                                                                                                                                                                                                                                                                                                                                                      |   |
|--------------------------------------------|----|--------------------------------------------------------------------------------------------------------------------------------------------------------------------------------------------------------------------------------------------------------------------------------------------------------------------------------------------------------------------------------------------------------------------------------------------------------------------------------------------------------------------------------------------------------------------------------------------------------------------------------------|---|
| Problem formulation                        | #3 | Description and significance of the problem / phenomenon studied: review of relevant theory and empirical work; problem statement                                                                                                                                                                                                                                                                                                                                                                                                                                                                                                    | 2 |
| Purpose or research question               | #4 | Purpose of the study and specific objectives or questions                                                                                                                                                                                                                                                                                                                                                                                                                                                                                                                                                                            | 3 |
| Qualitative approach and research paradigm | #5 | Qualitative approach (e.g. ethnography, grounded theory, case study, phenomenology, narrative research) and guiding theory if appropriate; identifying the research paradigm (e.g. postpositivist, constructivist / interpretivist) is also recommended; rationale. The rationale should briefly discuss the justification for choosing that theory, approach, method or technique rather than other options available; the assumptions and limitations implicit in those choices and how those choices influence study conclusions and transferability. As appropriate the rationale for several items might be discussed together. | 3 |
| Researcher characteristics and reflexivity | #6 | Researchers' characteristics that may influence the research, including personal attributes, qualifications / experience, relationship with participants, assumptions and / or presuppositions; potential or actual interaction between researchers' characteristics and the research                                                                                                                                                                                                                                                                                                                                                | 4 |

|    |                           |     |                                                           |    |
|----|---------------------------|-----|-----------------------------------------------------------|----|
| 1  |                           |     | questions, approach, methods, results and / or            |    |
| 2  |                           |     | transferability                                           |    |
| 3  |                           |     |                                                           |    |
| 4  |                           |     |                                                           |    |
| 5  |                           |     |                                                           |    |
| 6  | Context                   | #7  | Setting / site and salient contextual factors; rationale  | 4  |
| 7  |                           |     |                                                           |    |
| 8  |                           |     |                                                           |    |
| 9  | Sampling strategy         | #8  | How and why research participants, documents, or          | 4  |
| 10 |                           |     | events were selected; criteria for deciding when no       |    |
| 11 |                           |     | further sampling was necessary (e.g. sampling             |    |
| 12 |                           |     | saturation); rationale                                    |    |
| 13 |                           |     |                                                           |    |
| 14 |                           |     |                                                           |    |
| 15 |                           |     |                                                           |    |
| 16 |                           |     |                                                           |    |
| 17 |                           |     |                                                           |    |
| 18 |                           |     |                                                           |    |
| 19 | Ethical issues pertaining | #9  | Documentation of approval by an appropriate ethics        | 12 |
| 20 | to human subjects         |     | review board and participant consent, or explanation for  |    |
| 21 |                           |     | lack thereof; other confidentiality and data security     |    |
| 22 |                           |     | issues                                                    |    |
| 23 |                           |     |                                                           |    |
| 24 |                           |     |                                                           |    |
| 25 |                           |     |                                                           |    |
| 26 |                           |     |                                                           |    |
| 27 |                           |     |                                                           |    |
| 28 |                           |     |                                                           |    |
| 29 | Data collection methods   | #10 | Types of data collected; details of data collection       | 4  |
| 30 |                           |     | procedures including (as appropriate) start and stop      |    |
| 31 |                           |     | dates of data collection and analysis, iterative process, |    |
| 32 |                           |     | triangulation of sources / methods, and modification of   |    |
| 33 |                           |     | procedures in response to evolving study findings;        |    |
| 34 |                           |     | rationale                                                 |    |
| 35 |                           |     |                                                           |    |
| 36 |                           |     |                                                           |    |
| 37 |                           |     |                                                           |    |
| 38 |                           |     |                                                           |    |
| 39 |                           |     |                                                           |    |
| 40 |                           |     |                                                           |    |
| 41 |                           |     |                                                           |    |
| 42 |                           |     |                                                           |    |
| 43 | Data collection           | #11 | Description of instruments (e.g. interview guides,        | 4  |
| 44 | instruments and           |     | questionnaires) and devices (e.g. audio recorders) used   |    |
| 45 | technologies              |     | for data collection; if / how the instruments(s) changed  |    |
| 46 |                           |     | over the course of the study                              |    |
| 47 |                           |     |                                                           |    |
| 48 |                           |     |                                                           |    |
| 49 |                           |     |                                                           |    |
| 50 |                           |     |                                                           |    |
| 51 |                           |     |                                                           |    |
| 52 |                           |     |                                                           |    |
| 53 | Units of study            | #12 | Number and relevant characteristics of participants,      | 4  |
| 54 |                           |     | documents, or events included in the study; level of      |    |
| 55 |                           |     | participation (could be reported in results)              |    |
| 56 |                           |     |                                                           |    |
| 57 |                           |     |                                                           |    |
| 58 |                           |     |                                                           |    |
| 59 |                           |     |                                                           |    |
| 60 |                           |     |                                                           |    |

|    |                         |     |                                                             |      |
|----|-------------------------|-----|-------------------------------------------------------------|------|
| 1  | Data processing         | #13 | Methods for processing data prior to and during             | 5    |
| 2  |                         |     | analysis, including transcription, data entry, data         |      |
| 3  |                         |     | management and security, verification of data integrity,    |      |
| 4  |                         |     | data coding, and anonymisation / deidentification of        |      |
| 5  |                         |     | excerpts                                                    |      |
| 6  |                         |     |                                                             |      |
| 7  |                         |     |                                                             |      |
| 8  |                         |     |                                                             |      |
| 9  |                         |     |                                                             |      |
| 10 |                         |     |                                                             |      |
| 11 |                         |     |                                                             |      |
| 12 |                         |     |                                                             |      |
| 13 | Data analysis           | #14 | Process by which inferences, themes, etc. were              | 5    |
| 14 |                         |     | identified and developed, including the researchers         |      |
| 15 |                         |     | involved in data analysis; usually references a specific    |      |
| 16 |                         |     | paradigm or approach; rationale                             |      |
| 17 |                         |     |                                                             |      |
| 18 |                         |     |                                                             |      |
| 19 |                         |     |                                                             |      |
| 20 |                         |     |                                                             |      |
| 21 |                         |     |                                                             |      |
| 22 |                         |     |                                                             |      |
| 23 | Techniques to enhance   | #15 | Techniques to enhance trustworthiness and credibility       | 5    |
| 24 | trustworthiness         |     | of data analysis (e.g. member checking, audit trail,        |      |
| 25 |                         |     | triangulation); rationale                                   |      |
| 26 |                         |     |                                                             |      |
| 27 |                         |     |                                                             |      |
| 28 |                         |     |                                                             |      |
| 29 |                         |     |                                                             |      |
| 30 |                         |     |                                                             |      |
| 31 | Syntheses and           | #16 | Main findings (e.g. interpretations, inferences, and        | 5-8  |
| 32 | interpretation          |     | themes); might include development of a theory or           |      |
| 33 |                         |     | model, or integration with prior research or theory         |      |
| 34 |                         |     |                                                             |      |
| 35 |                         |     |                                                             |      |
| 36 |                         |     |                                                             |      |
| 37 |                         |     |                                                             |      |
| 38 |                         |     |                                                             |      |
| 39 | Links to empirical data | #17 | Evidence (e.g. quotes, field notes, text excerpts,          | 5-8  |
| 40 |                         |     | photographs) to substantiate analytic findings              |      |
| 41 |                         |     |                                                             |      |
| 42 |                         |     |                                                             |      |
| 43 |                         |     |                                                             |      |
| 44 | Intergration with prior | #18 | Short summary of main findings; explanation of how          | 9-11 |
| 45 | work, implications,     |     | findings and conclusions connect to, support, elaborate     |      |
| 46 | transferability and     |     | on, or challenge conclusions of earlier scholarship;        |      |
| 47 | contribution(s) to the  |     | discussion of scope of application / generalizability;      |      |
| 48 | field                   |     | identification of unique contributions(s) to scholarship in |      |
| 49 |                         |     | a discipline or field                                       |      |
| 50 |                         |     |                                                             |      |
| 51 |                         |     |                                                             |      |
| 52 |                         |     |                                                             |      |
| 53 |                         |     |                                                             |      |
| 54 |                         |     |                                                             |      |
| 55 |                         |     |                                                             |      |
| 56 |                         |     |                                                             |      |
| 57 |                         |     |                                                             |      |
| 58 |                         |     |                                                             |      |
| 59 |                         |     |                                                             |      |
| 60 |                         |     |                                                             |      |



|    |                       |     |                                                          |    |
|----|-----------------------|-----|----------------------------------------------------------|----|
| 1  | Limitations           | #19 | Trustworthiness and limitations of findings              | 2  |
| 2  |                       |     |                                                          |    |
| 3  |                       |     |                                                          |    |
| 4  | Conflicts of interest | #20 | Potential sources of influence of perceived influence on | 12 |
| 5  |                       |     | study conduct and conclusions; how these were            |    |
| 6  |                       |     | managed                                                  |    |
| 7  |                       |     |                                                          |    |
| 8  |                       |     |                                                          |    |
| 9  |                       |     |                                                          |    |
| 10 |                       |     |                                                          |    |
| 11 |                       |     |                                                          |    |
| 12 | Funding               | #21 | Sources of funding and other support; role of funders in | 12 |
| 13 |                       |     | data collection, interpretation and reporting            |    |
| 14 |                       |     |                                                          |    |
| 15 |                       |     |                                                          |    |
| 16 |                       |     |                                                          |    |

17 The SRQR checklist is distributed with permission of Wolters Kluwer © 2014 by the Association of  
18 American Medical Colleges. This checklist was completed on 22. January 2019 using  
19 <https://www.goodreports.org/>, a tool made by the [EQUATOR Network](#) in collaboration with  
20 [Penelope.ai](#)  
21  
22  
23  
24  
25  
26  
27  
28  
29  
30  
31  
32  
33  
34  
35  
36  
37  
38  
39  
40  
41  
42  
43  
44  
45  
46  
47  
48  
49  
50  
51  
52  
53  
54  
55  
56  
57  
58  
59  
60

# BMJ Open

**Hope for the best ...but expect the worst: A qualitative study to explore how women with recurrent miscarriage experience the early waiting period of a new pregnancy**

|                                 |                                                                                                                                                                                                                                                                                                                                                                                                                                                                                                      |
|---------------------------------|------------------------------------------------------------------------------------------------------------------------------------------------------------------------------------------------------------------------------------------------------------------------------------------------------------------------------------------------------------------------------------------------------------------------------------------------------------------------------------------------------|
| Journal:                        | <i>BMJ Open</i>                                                                                                                                                                                                                                                                                                                                                                                                                                                                                      |
| Manuscript ID                   | bmjopen-2019-029354.R1                                                                                                                                                                                                                                                                                                                                                                                                                                                                               |
| Article Type:                   | Research                                                                                                                                                                                                                                                                                                                                                                                                                                                                                             |
| Date Submitted by the Author:   | 16-Apr-2019                                                                                                                                                                                                                                                                                                                                                                                                                                                                                          |
| Complete List of Authors:       | Bailey, Sarah; University of Southampton, Obstetrics and Gynaecology; University Hospital Southampton NHS Foundation Trust<br>Boivin, Jacky; Cardiff University, School of Psychology<br>Cheong, Ying; University of Southampton, Obstetrics and Gynaecology; Complete Fertility Centre, Princess Anne Hospital<br>Kitson-Reynolds, Ellen; University of Southampton, Midwifery<br>Bailey, Christopher; University of Nottingham<br>Macklon, Nick; London Womens Clinic; Zealand University Hospital |
| <b>Primary Subject Heading</b>: | Reproductive medicine                                                                                                                                                                                                                                                                                                                                                                                                                                                                                |
| Secondary Subject Heading:      | Obstetrics and gynaecology                                                                                                                                                                                                                                                                                                                                                                                                                                                                           |
| Keywords:                       | recurrent miscarriage, adaptation, psychological, anxiety, pregnancy                                                                                                                                                                                                                                                                                                                                                                                                                                 |
|                                 |                                                                                                                                                                                                                                                                                                                                                                                                                                                                                                      |

SCHOLARONE™  
Manuscripts

1  
2  
3  
4 Hope for the best ...but expect the worst: A qualitative study to explore how women  
5 with recurrent miscarriage experience the early waiting period of a new pregnancy  
6  
7  
8  
9

10  
11 Authors

- 12 1. Dr Sarah Bailey – University Hospitals Southampton NHS Foundation Trust /  
13 University of Southampton; [sarahl.bailey@soton.ac.uk](mailto:sarahl.bailey@soton.ac.uk)  
14  
15  
16 2. Professor Jacky Boivin – University of Cardiff; [boivin@cardiff.ac.uk](mailto:boivin@cardiff.ac.uk)  
17  
18  
19 3. Professor Ying Cheong – Director Complete Fertility Centre Southampton / University  
20 of Southampton; [y.cheong@soton.ac.uk](mailto:y.cheong@soton.ac.uk)  
21  
22  
23 4. Dr Ellen Kitson-Reynolds – University of Southampton; [e.l.kitson-](mailto:e.l.kitson-reynolds@soton.ac.uk)  
24 [reynolds@soton.ac.uk](mailto:reynolds@soton.ac.uk)  
25  
26  
27 5. Dr Christopher Bailey – Honorary Ass. Professor University of Nottingham;  
28 [ntacb7@nottingham.ac.uk](mailto:ntacb7@nottingham.ac.uk)  
29  
30  
31 6. Professor Nick Macklon – The London Women’s Clinic;  
32 [nick.macklon@londonwomensclinic.com](mailto:nick.macklon@londonwomensclinic.com)  
33  
34  
35

36 Correspondence to:

37 Dr Sarah Bailey;

38  
39 [sarahl.bailey@soton.ac.uk](mailto:sarahl.bailey@soton.ac.uk)  
40  
41  
42  
43

44 Word count:

45 4943 (excluding title page, references, figures and acknowledgements)  
46  
47  
48  
49

50 Key words:

51 Recurrent miscarriage, adaptation psychological, anxiety, pregnancy  
52  
53  
54  
55  
56  
57  
58  
59  
60

## Abstract

*Objective:* To investigate how women experience the initial period of a new pregnancy after suffering recurrent miscarriage.

*Design:* A qualitative study, nested within a randomised controlled feasibility study of a coping intervention for recurrent miscarriage, used semi-structured face-to-face interviews. Interviews were audio-recorded, transcribed verbatim and analyzed utilizing a thematic network approach.

*Setting:* Participants were recruited from the Recurrent Miscarriage Clinic and Early Pregnancy Unit in two tertiary referral hospitals in the United Kingdom.

*Participants:* 14 women with recurrent miscarriages and who had previously participated in the RCT feasibility component of the study, were recruited.

*Results:* Seven organising themes emerged from the data: (1) turmoil of emotions; (2) preparing for the worst; (3) setting of personal milestones; (4) hypervigilance; (5) social isolation; (6) adoption of pragmatic approaches; (7) need for professional affirmation.

*Conclusions:* The study established that for women with a history of recurrent miscarriage, the waiting period of a new pregnancy is a traumatic time of great uncertainty and emotional turmoil and one in which they express a need for emotional support. Consideration should be given to the manner in which supportive care is best delivered within the constraints of current health service provision.

*Trial registration:* This study is registered with the ISCTRN registry. Registration number: ISRCTN43571276

### Strengths and limitations of this study

- This qualitative study addresses a gap in the literature, providing new and detailed data on how women experience the initial period of a new pregnancy following recurrent miscarriage.
- Qualitative face-to-face interviews enabled the exploration of this sensitive time period, giving participants the opportunity to convey their personal experiences
- While every effort was made to support the recruitment of a diverse sample to this study, the UK setting may limit extrapolation to other national and cultural contexts.

- The purposive sampling strategy enabled an inclusive approach to data collection from the ethnicities represented in the main feasibility study sample.

## Introduction

Miscarriage is the most common adverse outcome of pregnancy<sup>1</sup>. It has been defined as the spontaneous demise of a pregnancy before the fetus reaches viability, therefore the term includes all pregnancy losses from the time of conception until 24 weeks of gestation<sup>2</sup>. Recurrent miscarriage (RM) is currently defined as the loss of three or more consecutive pregnancies within the UK<sup>3</sup>. However, other countries have adopted different definitions and the recently published European Society Human Reproduction and Embryology (ESHRE) guideline concludes that a diagnosis of RM could be considered after the loss of two or more pregnancies<sup>2</sup>. The prevalence of RM is significantly lower than sporadic miscarriage, but the exact occurrence is difficult to estimate<sup>2</sup>. When defined as the loss of three or more consecutive pregnancies then it is proposed that 1 % of couples who are trying to conceive are affected<sup>3</sup>. However, the recently published ESHRE guidelines suggest that at least 1-2% of couples experience recurrent pregnancy loss<sup>2</sup>.

This repeated and unintentional loss of pregnancy has been described as a distinct disease entity<sup>4-6</sup> given that the observed incidence of RM is much higher than would be expected to occur by chance alone. The ESHRE guideline on the recommended treatment and investigation of recurrent miscarriage highlights the lack of evidence based investigations and treatments available for this condition<sup>2</sup>. Consistent with other guidelines<sup>3</sup> it highlights the need to ensure care is tailored to the psychological needs of couples. Whilst the loss of any desired pregnancy ending in miscarriage is a profound and negative life event, recurrent miscarriage represents an extremely distressing condition that can be both physically and emotionally traumatising. The repetitive nature of recurrent pregnancy loss may intensify the grief and distress experienced, delivering a significant emotional impact on those affected<sup>2</sup>. The experience can evoke intense feelings surrounding a lost baby, a lost future child and a lost motherhood<sup>7</sup>.

Numerous studies have investigated emotional morbidity in women in the period immediately following miscarriage<sup>8-10</sup>. More recently, a study by Kolte, et al.<sup>11</sup> concluded that increased levels of psychological distress and major depression are significantly more common among women with recurrent miscarriage compared to women trying to achieve pregnancy who had not experienced this. This corresponds with the findings from previous studies, investigating emotional morbidity in women with recurrent pregnancy loss, which indicated that increased levels of anxiety and depression are often experienced throughout subsequent pregnancies<sup>12 13</sup>.

1  
2  
3 The early stages of a new pregnancy when confirmation by ultrasound scan of an ongoing  
4 and viable pregnancy is awaited, represent a particularly challenging period for women  
5 affected by RM due to their anxiety that they will experience a further miscarriage <sup>14</sup>.  
6  
7

8  
9 Medical waiting periods have been defined as those during which patients wait for test  
10 results that could be potentially threatening to their wellbeing <sup>15</sup>. These waiting periods  
11 appear to have a distinct emotional signature. Psychological stress reactions are present and  
12 build from the start of any waiting period whereby anticipation of loss leads to further  
13 anxiety and prolonged psychological distress <sup>16</sup>. Lazarus and Folkman <sup>17</sup> have proposed that  
14 the conditions that create stressful situations are particularly applicable to medical waiting  
15 periods. These characteristics include waiting for an outcome that can have negative  
16 consequences of significant impact consequences for the individual, and the fact that it is  
17 not possible to change, control or predict the outcome. These stressors are uniquely  
18 characteristic of the waiting period of a new pregnancy following RM.  
19  
20  
21  
22

23  
24 In the context of pregnancy after RM, the waiting period generally refers to the first 12  
25 weeks of a pregnancy, although the actual length can vary between women and is often  
26 dependent on the timing of their previous miscarriages. However, a scan at 12 weeks  
27 gestation confirming viability is associated with a greater than 95% chance <sup>18</sup> of an ongoing  
28 pregnancy and this reassurance can be considered to mark the end of the waiting period.  
29  
30

31  
32 Published research data assessing the psychological morbidity associated with the difficult  
33 waiting period of a new pregnancy are scarce, however a qualitative study exploring the  
34 experiences and coping strategies of women during the initial waiting period (weeks 1-12) of  
35 pregnancy after miscarriage revealed extreme anxiety about pregnancy outcome <sup>14</sup>. As the  
36 number of previous miscarriages increased women with RM felt extremely anxious about  
37 the pregnancy outcome, proposing that this uncertainty grew after each miscarriage and  
38 their coping was orientated towards presumed failure (a further miscarriage). Another study  
39 by Hutti, et al. <sup>19</sup>, has suggested that instead of experiencing this period as a time of 'joyful  
40 anticipation,' couples who have previously experienced recurrent pregnancy loss frequently  
41 experience increased levels of anxiety and worry.  
42  
43  
44  
45  
46

47  
48 Despite the emotional morbidity associated with the waiting period, many women who  
49 have experienced RM are not provided with support during this time and are left to cope  
50 alone with their anxiety. This is mainly because existing supportive interventions are labour  
51 intensive and expensive to provide and as urgency is almost immediate, it may be difficult to  
52 provide support quickly. The limited data available make it difficult to promote and target  
53 the development of therapeutic support for women with RM during the early waiting stages  
54 of a new pregnancy. To improve psychological wellbeing during this challenging time, there  
55 is a need to develop a deeper and more extensive understanding of lived experiences.  
56  
57  
58  
59  
60

1  
2  
3 The qualitative study presented in this paper was nested within a two-centre RCT feasibility  
4 study of a novel self-help intervention designed to support women with a history of RM to  
5 cope with the waiting period before confirmation of a new ongoing pregnancy<sup>20 21</sup>. The  
6 design and methodology of this paper have been published elsewhere<sup>20</sup> and the results will  
7 be reported separately.  
8  
9

10  
11 The aim of the presented paper was to develop a deeper understanding and detailed insight  
12 in to the lived experience of women with repeated pregnancy loss during the early 'waiting'  
13 stages of a new pregnancy.  
14  
15

## 16 17 Methods

### 18 19 Design

20 This qualitative study was designed to develop a deeper understanding of the types of  
21 emotional reaction to the waiting period to target the development of psychological  
22 therapeutic support for this group of women.  
23  
24  
25

### 26 27 Patient and Public Involvement

28 A Patient and Public Involvement (PPI) advisory group supported this research and met on a  
29 regular basis for the duration of this study. The group were involved with the design of the  
30 study and commented on any potential burden of participating in the study from a patient's  
31 perspective. The group were involved with data interpretation, and at the end of the study  
32 commented on the findings and contributed to the dissemination plan.  
33  
34  
35

### 36 37 Participants

38 The study population consisted of patients attending the Recurrent Miscarriage Clinic and  
39 the Early Pregnancy Unit in two tertiary referral hospitals in the South of England.  
40  
41

42 Between February 2014 and May 2016, 107 eligible women were invited to take part in a  
43 feasibility RCT testing a self-administered psychological support<sup>20 21</sup>. Participants became  
44 eligible to take part in this qualitative study once they had completed the intervention. This  
45 included participants who had reached twelve weeks of pregnancy and those who had  
46 unfortunately experienced a further miscarriage. Care was taken to allow a suitable time-  
47 period to elapse before participants were approached and invited to take part in an  
48 interview following a miscarriage. The aim of sampling was to collect perspectives from as  
49 diverse a group as possible. Selection characteristics considered in the purposive sampling  
50 strategy included study group in the RCT (control or intervention), ongoing pregnancy or  
51 miscarriage, ethnicity of participant, education level of participant and clinically important  
52 demographics such as age, comorbidity/medical conditions and previous live births. Of the  
53 15 participants invited to take part in the qualitative element of the study, only one declined  
54 participation. Figure 1 illustrates the key demographic information of study participants  
55  
56  
57  
58  
59  
60

## Data Collection

Data were collected face-to-face, during semi-structured interviews and took place at a convenient time and place for the participant. Recruitment was stopped when data saturation was achieved. All participants signed a consent form and were interviewed on an individual basis by the primary author. A topic guide was utilised to steer the general direction of the data collection, but participants were encouraged to speak freely about their perceptions and experiences of the waiting period of a new pregnancy to increase the understanding of the emotional reactions experienced during this time. The interviews lasted between thirty and sixty minutes and were audio recorded then transcribed verbatim.

## Analysis

Evidence of reliability and validity in qualitative research methods is important to ensure the process of analysis is clear, transparent and trustworthy<sup>22</sup>. 'Thematic Network Analysis'<sup>23</sup> was used as an analytic tool in this study to provide a robust and highly sensitive means of supporting thematic analysis and it facilitated an open and systematic approach. This method of analysis enabled the development of thematic networks that summarised the main themes apparent in the interview transcripts. As demonstrated in Figure 2, the method simply provided a technique for breaking up the text into 'Basic Themes' (the most basic theme or lowest order theme), 'Organising Themes' (a middle-order theme that organises the Basic Themes into clusters of similar issues) and 'Global Themes' (which are macro themes that summarise and make sense of the clusters of lower-order themes).

Thematic network analysis shares the key features of any hermeneutic analysis and is not a new method of analysis. However, the use of its web-like network as an organising principle and representational means, helped to make explicit the procedures utilised in moving from text to interpretation of data<sup>23</sup>. Figure 3 illustrates how transcribed data from this study were developed from basic themes into a single global theme.

Transparency of data analysis was aided by the use of field notes and memos and by discussing the emerging themes with co-authors proficient in qualitative research analysis. Finally, basic and organising themes were grouped and refined following further analysis and discussion with co-authors.

## Results

Analysis of the data identified seven 'Organising Themes.' These middle order themes were the principles on which the global theme of 'Hope for the best, but expect the worst,' was based and form the basis for the presentation of the results of this qualitative study.

The findings of this study and the illustrated quotes are representative of the perceptions and feelings of both groups of women in the RCT feasibility study (those who received the intervention and those who did not). Furthermore, although at the time of the interviews 8



1  
2  
3 of the 14 women interviewed had ongoing pregnancies, they felt well able to reflect back on  
4 their experiences of the early waiting period with accuracy and did not feel their ongoing  
5 pregnancy affected their recollection of emotions at this time.  
6  
7

### 8 Organising Theme 1: Turmoil of emotions 9

10 The organising theme of 'turmoil of emotions' brings together the numerous reactions and  
11 feelings experienced by women with RM during the early stages of a new pregnancy while  
12 they are waiting for confirmation by ultrasound scan that it is ongoing. As outlined in Box 1,  
13 the women experienced a plethora of emotions whereby any initial excitement caused by  
14 the positive pregnancy test was quickly over-taken, by worry and fear that they would  
15 miscarry again.  
16  
17

18  
19 The acute uncertainty of this situation appeared to compound the experience and the  
20 women's distress as they continually ruminated upon the outcome of their pregnancy  
21 because they were unable to accurately predict the outcome of the pregnancy. Instead, the  
22 women focused on what might happen and this meant it was difficult for them to utilise  
23 strategies to cope with the situation they found themselves in, as they had no definite idea  
24 of what would actually happen. The interviewees suggested that the situation was made  
25 worse by the 'not knowing' of what the outcome of the pregnancy would be. Once the  
26 uncertainty of the waiting period was over, because the pregnancy was progressing as  
27 expected and they felt confident that their pregnancy would continue or because they  
28 unfortunately experienced a further miscarriage, then the negative emotional effects of  
29 uncertainty appeared to reduce.  
30  
31  
32  
33  
34

35 All of the interviewees provided extremely powerful examples of the turmoil of emotions  
36 they had experienced during the waiting period with the majority of participants referring to  
37 the significant levels of anxiety and worry they experienced during this time. This was often  
38 overwhelming for them, affecting every aspect of their life and an emotion they were  
39 unable to escape from or forget. Accompanying the extremes levels of anxiety and the  
40 worry, several of the interviewees described emotions of fear and even terror at the  
41 situation they were in and the potential outcome of their pregnancy.  
42  
43  
44

45 A number of participants remarked that a further notable emotion present throughout the  
46 waiting period was guilt, with the women blaming themselves entirely for their  
47 miscarriages. They spent time contemplating the lifestyle choices they had made in the past  
48 (for example previous smoking/alcohol consumption or previous terminations of  
49 pregnancy), but they also felt guilty for letting down their partner and family at their  
50 inability to have a successful pregnancy.  
51  
52  
53

54 Participants commonly expressed their shame at experiencing the emotions of jealousy and  
55 envy when they encountered other pregnant women or those with small babies,  
56 acknowledging the negative connotations of this emotion. They were, however, keen to  
57  
58  
59  
60

point out that it was not a personal thing against the pregnant woman or new mother, rather that they wished it was them in that situation.

BOX 1: Turmoil of emotions

*Sometimes you will be happy, sometimes you will be sad, sometimes you will be angry. To me it always feels like a fire has been put out inside you, so you can smile, do whatever you want to, but your eyes just feel blank - Participant 6 (4 miscarriages)*

*Because of how anxious I was, it was affecting everything. I was really anxious. I wasn't sleeping properly, you worry about everything you eat, everything you drink. You just criticize and analyse everything you do all day long, all night long ... Being anxious makes you anxious so it's a real vicious circle - Participant 8 (3 miscarriages)*

*The more you know what can go wrong, it becomes even more frightening ... It is terrifying really, literally terrifying and that is how I feel - Participant 7 (4 miscarriages)*

## Organising Theme 2: Preparing for the worst

This organising theme conveys the emotional strategies utilised by the women to try to remain emotionally detached from the pregnancy, keeping themselves 'in check' because they did not want to let themselves become excited about the pregnancy (as outlined in Box 2).

A positive pregnancy test was met with feelings of anxiety, trepidation and negativity. It was a moment of realisation and the women described this as being back on the 'rollercoaster' of pregnancy and its associated worry. Women were reluctant to share news of the pregnancy with family and friends because they were certain another miscarriage would occur. Interviewees also suggested that they suppressed any hope of a successful pregnancy and avoided thinking about a future with their unborn child. This appeared to be linked to a notion of self-preservation/protection. By attempting to prepare for the worst outcome (i.e. a further miscarriage) they would be less upset if another miscarriage occurred.

BOX 2: Preparing for the worst

*It's the not knowing and it's the being unable to believe anything except the worst. I find I'm baffled by how pregnancies work these days, I'm kind of constantly surprised that people are having babies because my experience is so different ... so now it's impossible to believe that it's going to be okay... I just came to the conclusion that the kindest thing I could do for myself was not to hope. The most likely outcome is that you are not going to have that addition to your family and so actually there's no point picturing what life is going to be like because picturing it is exciting and it's hoping for a future that probably isn't going to be there. Hope just feels utterly naïve now - Participant 13 (4 miscarriages)*

*I was very detached from the whole pregnancy ...it was self-preservation kind of mode - Participant 11 (4 miscarriages)*

*I think it's a self-preservation because of what you've been through, but I was never like that with my daughter. It's a learnt behaviour definitely ... it's almost like you can't let yourself dream this might happen after wanting it so long – Participant 10 (3 miscarriages)*

*I think me and my husband ended up trying not to think about it too much ... you don't want to get your hopes up so we'd be very cautious about even really talking about the positives in case it was bad news – Participant 14 (3 miscarriages)*

*I need to be real and I prepare for the worst, but hope for the best and that's almost like a protective shield around me – Participant 8 (3 miscarriages)*

### Organising Theme 3: Setting of Personal milestones

The interviewees placed huge importance on the need to attain personal milestones, using this as a method of navigating their way through the uncertainty of the waiting period (Box 3). This was frequently achieved by breaking the pregnancy up in to smaller time chunks, thinking of the first trimester in individual weeks, or even days, rather than as a whole period of time. In addition, the participants frequently recalled how they tried to live the early stages of a new pregnancy day-by-day, trying not to think too far ahead, living in the moment.

The women's personal milestones often consisted of reaching and going past the gestation of their previous miscarriages, or achieving midwife or scan appointments.

During the interviews, participants were asked if anything had helped them cope with the waiting period and everyone referred to the value of reassurance from ultrasound scans and how they broke up this time into more manageable time chunks. Interestingly, however, all women commented that any optimism they felt after a positive scan was short-lived and feelings of anxiety soon started to re-emerge.

#### BOX 3: Setting of personal milestones

*It's one day at a time, that's how we live one day at a time and that's how we've lived since June and I don't think it's a bad thing because we are appreciating that emotions can change from day to day ...rather than think about the birth we think about little hurdles ... I try not to think too far ahead because I get overwhelmed with things – Participant 12 (3 miscarriages)*

*It's kind of like you are trying to climb a ladder and the first rung up is the twelve week scan, but at least if you have a seven week scan and things are okay then you can stand on that rung and you know you've got that far - Participant 13 (4 miscarriages)*

*As soon as I confirmed the pregnancy they told me that they would get me in for scans at 6,8 and 10 weeks which helps because you've then got a 2 week marker to break up the 12 weeks. But I would say the anxiety massively increases up towards the scan ... it build, builds, builds and then you have a scan and it drops so by the time I would go to a scan, especially the 6 week scan I was a complete mess and really struggling to hold it together, crying a lot and incredibly nervous, body full of adrenaline and really, really anxious - Participant 3 (6 miscarriages)*

### Organising Theme 4: Hypervigilance

Study participants frequently reported using observing strategies and hypervigilance to help them monitor their pregnancy symptoms, considering symptoms such as nausea, tiredness and breast tenderness as signs of an ongoing pregnancy (Box 4). Many of the participants detailed checking as an obsession and something they could not help doing, wanting constantly to seek reassurance that their pregnancy was ongoing.

One of the most common early signs of miscarriage is the onset of vaginal bleeding or spotting. Many were so convinced that they were going to experience a further miscarriage

1  
2  
3 that they frequently reported repeated visits to the toilet to check for the onset of vaginal  
4 bleeding. This could often amount to numerous toilet visits every hour.  
5

6  
7 Participants expressed that when pregnancy symptoms were more intense then they felt  
8 more certain of an ongoing pregnancy, however any fluctuation in symptoms increased  
9 their feelings of uncertainty and caused added emotional distress.  
10  
11  
12  
13  
14  
15  
16  
17  
18  
19  
20  
21

22 **BOX 4: Hypervigilance**

23 *Knicker checking is a big obsession - Participant 5 (4 miscarriages)*

24  
25 *You are constantly monitoring your pregnancy symptoms, constantly. Do I feel the same as I did yesterday, are my 'boobs'*  
26 *still sore, do I need to go to the toilet more often or am I just drinking more? And you are constantly questioning every*  
27 *single twinge you feel and you are dying to get morning sickness so that you know you are pregnant – it's just all consuming*  
28 *- Participant 3 (6 miscarriages)*

29  
30 *I was just constantly nauseous and if I wasn't thinking about it I probably wouldn't have realised that I was nauseous,*  
31 *because it wasn't that bad. But I felt myself thinking about it and I wanted to feel that feeling sickness just so I know that*  
32 *something is happening. Until now every single time I go to the bathroom I have to check that I'm not bleeding and I've*  
33 *been doing it since the beginning of my pregnancy. I also spent quite a bit of money on pregnancy tests just to see ... I did*  
34 *them almost everyday, but I couldn't help it - Participant 9 (3 miscarriages)*  
35  
36

37 **Organising Theme 5: Social isolation**

38  
39 This organising theme brings together the participants' views on social interaction during  
40 the waiting period (Box 5). Many reported that they felt isolated and lonely during this time.  
41 This was compounded by the fact that the women often isolated themselves from friends  
42 and family, reluctant to share the news of their pregnancy because they felt certain a  
43 further miscarriage would occur, therefore, there was no point in telling people. There was  
44 also an innate fear for several participants that sharing the news of their pregnancy in the  
45 early stages would tempt fate and as a result, they would experience a further miscarriage.  
46  
47  
48

49  
50 There appeared to be a general withdrawal from social situations and social media, mainly  
51 due to the fear of forced social interaction with other pregnant women or those announcing  
52 news of a pregnancy. Compounding the degree of isolation was the fact that the women  
53 also appeared to feel safer and protected at home as they felt this environment might  
54 reduce the risk of miscarriage.  
55  
56

57 **BOX 5: Social isolation**

58  
59 *You want to tell people of course you do, but it makes you very private, very keep yourself to yourself - Participant 12 (3*  
60 *miscarriages)*

1  
2  
3  
4  
5  
6  
7  
8  
9  
10  
11  
12  
13  
14  
15  
16  
17  
18  
19  
20  
21  
22  
23  
24  
25  
26  
27  
28  
29  
30  
31  
32  
33  
34  
35  
36  
37  
38  
39  
40  
41  
42  
43  
44  
45  
46  
47  
48  
49  
50  
51  
52  
53  
54  
55  
56  
57  
58  
59  
60

*It's really difficult I think these days with Facebook, it's really hard. I had to block a few people who put scan photos up or bump pictures. I found bump photos really hard because you think am I ever going to get there? Is that ever going to be me? - Participant 3 (6 miscarriages)*

*I've never been so scared to go outside my front door because I might just bump in to someone who is pregnant. Pregnancy just seemed to be everywhere. It's just one of those things where you become really heightened to it ... and it was just awful, absolutely awful - Participant 8 (3 miscarriages)*

*I didn't want to speak to anybody, I didn't want to face anybody – Participant 9 (3 miscarriages)*

## Organising Theme 6: Adoption of pragmatic approaches

This organising theme brings together some of the pragmatic and practical approaches participants utilised to try to manage the stress and uncertainty of the waiting period (Box 6). The women referred to the fact that these practical approaches appeared to give them back some control in a situation where they had none.

Pragmatic approaches to coping with the anxiety often consisted of simple distraction techniques and keeping busy. This was particularly evident in participants who already had children, however work often provided a big distraction for employed participants. Other participants used avoidance (namely not allowing themselves to think about the pregnancy and blocking it out of their thought processes).

Commonly, the women tried to adapt their lifestyle to eliminate factors they felt could increase the risk of miscarriage such as reducing strenuous exercise or improving nutritional intake. Lifestyle adaptations could be more extreme with women giving examples of never opening the window on a car journey to avoid pollution from other cars or avoiding taking baths or showers in pregnancy.

Many of the participants referred to the value of accessing peer support as one of the most useful practical approaches they could adopt during this time. They believed only women who had experienced their situation truly understood the anxieties and challenges they faced. In most cases peer support was accessed via on-line miscarriage support groups and forums.

### BOX 6: Adoption of pragmatic approaches

*The only thing that would help is my work ... It took my mind away so I didn't have time to think or dwell on think, so I think that was helpful - Participant 1 – (3 miscarriages)*

*I couldn't just dwell in my own self-pity about how hard it all was. So yes distraction did help, so if work hadn't given me distraction I would have gone and sought it. What made it better? Trying to be grateful, being distracted, really seriously just trying not to think about it - Participants 13 (4 miscarriages)*

*You stop more and more things. So you'll stop doing extra work, you'll start relaxing more. You'll stop doing some parts of your exercise, you'll stop eating different foods. You go through the most illogical things in your head – if I stay calm it will be alright, if I just do walking it will be fine - Participant 6 (4 miscarriages)*

## Organising Theme 7: Need for professional affirmation

In the final organising theme, interviewees shared their views on the level of care they actually received from health professionals during the waiting period of their pregnancy and their perceptions of the type of care they would like to have received. Furthermore, they described the need for health professionals' acknowledgement of the challenges they faced and the stress they experienced during the waiting period of a new pregnancy (Box 7).

A recurrent theme in the interviews was a sense that health service provision was both limited and unsupportive and the women felt that this demonstrated a lack of understanding of their needs during this testing time. Often the first health professional the woman accessed for support was their General Practitioner (GP). While the degree of support offered by individual GPs varied, interviewees frequently spoke of the lack of support and understanding shown by them. Lack of empathy was considered one of the most upsetting aspects of their situation. All participants expressed the need to be cared for in a sensitive and understanding manner.

In general, the participants referred to the fact that contact with health professionals during the uncertainty of the waiting period was very important. They understood that the involvement of a health professional would not make a difference to the outcome of their pregnancy, but the contact helped them to feel more supported and they valued being able to share their concerns.

When an individual did receive empathetic care from a health professional, whether that was a GP or a nurse working in the Early Pregnancy Unit, then it made a positive difference to their emotional well-being.

### BOX 7: Need for professional affirmation

*There is sometimes an absolute lack of understanding....I think generally the thing I would say to medical professionals is that they need to acknowledge that this person is probably going to be slightly damaged. Massive things don't have to change just some realisation of what a new pregnancy means to a woman who has been through all those lost pregnancies - Participant 10 (3 miscarriages)*

*It's the whole if you've got no pain and you've got no blood you are fine, that's what the GP would say - Participant 7 (4 miscarriages)*

*The EPU (Early Pregnancy Unit) staff were more gutted than I was I think, they were lovely... they were all just rooting for me and it was really nice - Participant 13 (4 miscarriages)*

## Discussion

1  
2  
3 Awaiting confirmation of an ongoing, viable pregnancy after having experienced recurrent  
4 miscarriage is a traumatic period marked by an intense struggle between hope and despair,  
5 hypervigilance of pregnancy symptoms and bracing for another miscarriage. This all  
6 occurring in a context of social isolation and feeling relatively unsupported by health  
7 professionals. Nevertheless, women were shown to adopt diverse coping strategies aimed  
8 at achieving a state of cautious optimism that served to maintain hope while bracing for the  
9 possibility of failure.  
10  
11  
12

13  
14 The findings from this study provide further evidence that there is a need for provision of  
15 psychological support to women during the difficult waiting period of a new pregnancy  
16 following recurrent miscarriage. It also offers new and previously unexplored insights in to  
17 how women experience this challenging time.  
18  
19

20  
21 The global theme identified in this study was that waiting is traumatic and a time in which  
22 the women hope for the best, but expect the worst. This global theme supports and  
23 expands on those reported by others. Previous research has demonstrated that women with  
24 a past history of repeated pregnancy loss utilise coping strategies to 'brace for the future,'  
25 as a means of attempting to control their emotions and future emotions as much as possible  
26 to prepare for the worst outcome<sup>14</sup>. This involved anticipating the negative feelings that a  
27 further miscarriage would cause and utilising bracing strategies such as not allowing  
28 themselves to think about a future with their unborn child and attempting to remain  
29 emotionally detached from the pregnancy. Behaviours similar to 'bracing for the worst'<sup>14</sup>  
30 have been reported in other studies that investigated pregnancy after previous perinatal  
31 loss, including 'holding back emotions'<sup>24</sup> and 'emotional cushioning'<sup>25</sup> which involves  
32 'compartmentalising the pregnancy and avoiding its emotional aspects for as long as  
33 possible'<sup>25</sup>. The compelling evidence from this study provides further evidence of bracing  
34 adding to suggestions from previous studies<sup>14</sup> that propose the need for further research to  
35 investigate the impact of bracing strategies on long-term bonding and attachment between  
36 child and parents.  
37  
38  
39  
40  
41  
42

43  
44 All participants concurred that the uncertainty of the situation compounded their emotional  
45 upset. The uncontrollability and unpredictability of the waiting period seemed a particularly  
46 difficult aspect for them to cope with. The formative work of Lazarus and Folkman<sup>17</sup>  
47 examined the processes of stress, appraisal and coping and identified the fact that both a  
48 lack of control over a situation and an inability to predict its outcome are potential stress  
49 inducing factors. If the demands of a situation exceed the level of coping resources available  
50 to the person then the affected individual is likely to experience stress, namely psychological  
51 (e.g. anxiety, worry), physiological (e.g. racing heart, tension) and behavioural responses  
52 (e.g. insomnia),<sup>17</sup>. The participants in this study consistently commented that the  
53 uncertainty of the waiting period was itself a stressor eliciting emotional turmoil, some even  
54 commenting on the relief they felt when a further miscarriage occurred as they felt better  
55 able to cope with the grief of miscarriage than the uncertainty of the waiting period.  
56  
57  
58  
59  
60 Positive reappraisal coping has been shown to be useful and valuable coping strategy and a

1  
2  
3 helpful tool to help sustain coping during periods of uncertainty<sup>26 27</sup>. This type of coping  
4 might provide some respite from the prolonged and unrelenting stress that women with  
5 recurrent miscarriage experience during the early stages of a new pregnancy and help to  
6 sustain their ability to cope during this challenging time. The RCT component of this study  
7 has investigated the use of a novel self-help coping intervention, the Positive Reappraisal  
8 Coping Intervention<sup>21 28</sup>. Further research is planned to explore the role of the Positive  
9 Reappraisal Coping Intervention and how it appears to generate resilience in its users.  
10  
11  
12

13  
14 One organising theme described the strong 'need for professional affirmation' and  
15 perceptions of the level of care patients would like to receive. In a pioneering piece of work  
16 Bradshaw<sup>29</sup> presented a taxonomy of social need in which he acknowledged that the  
17 concept of need was both complex and imprecise. Furthermore he emphasised the fact that  
18 need was relative and therefore needs identified by professional experts often differed from  
19 those felt by the individual. Certainly, a recurrent theme during the interviews was a sense  
20 that current health service provision for women with recurrent miscarriage during the  
21 waiting period of a new pregnancy was both limited and unsupportive. Participants felt  
22 these gaps in support demonstrated a lack of understanding of their needs during this  
23 challenging time. The need for professional support and reassurance was generated at the  
24 actual moment of realisation that they were pregnant again, following the positive  
25 pregnancy test and in general was experienced toward the first health professional they  
26 would contact for support and advice (i.e. their GP). Whilst the degree of support offered by  
27 GPs varied individually, many women spoke of their disappointment at the lack of  
28 understanding and compassion shown to them. There was a general feeling that any health  
29 professional interaction that took place within a dedicated Early Pregnancy Unit  
30 environment was more sensitive to their needs, but that there was still room for  
31 improvement.  
32  
33  
34  
35  
36  
37  
38

39  
40 Whilst this study builds on the results of other studies that have identified the importance  
41 of understanding and compassion from health professionals around the time of miscarriage  
42<sup>30 31</sup>, it specifically highlights the need for health professional support during the early stages  
43 of a new pregnancy following recurrent miscarriage.  
44  
45

46  
47 Clearly, consideration needs to be given to the most effective and appropriate ways in  
48 which health professionals can meet this demand for support, given the limited time  
49 constraints within which they work. GPs have time-limited consultations, often of less than  
50 ten minutes per patient and similarly secondary care health professionals work within  
51 restricted clinic appointment times. It is not always feasible to address every aspect of the  
52 woman's psychological needs during this time. For example, some women with recurrent  
53 miscarriage would prefer at least weekly reassurance ultrasound scans and others individual  
54 regular counselling sessions. However, the data from this study highlighted that in all cases,  
55 there was a sense amongst participants of the need to raise awareness within the health  
56 professional community of the potential emotional impact of the waiting period and the  
57 need for empathetic care. The participants acknowledged that they understood that the  
58  
59  
60



1  
2  
3 involvement of health professionals would not make a difference to the outcome of their  
4 pregnancy. Furthermore the women understood that their emotional needs fluctuated  
5 during the waiting period and therefore it was difficult for GPs and other health  
6 professionals to address these needs specifically. However, similar to the findings of a study  
7 by Musters, et al.<sup>10</sup> that investigated supportive care for women with recurrent miscarriage,  
8 women in this study noted that when health professionals took their emotional concerns  
9 seriously by listening to them and showing them understanding and empathy then it made a  
10 positive difference to their emotional wellbeing. The 'soft' skills of compassion, empathy  
11 and understanding appeared to meet the need for support during the uncertainty of the  
12 waiting period.  
13  
14  
15  
16  
17

18  
19 This study has two main strengths; its development and protocol was guided by an active  
20 PPI advisory group and this ensured the patient's perspective was central to the study.  
21 Secondly, the study addresses a gap in the literature and provides new and detailed  
22 qualitative data on how women experience the initial waiting period of a new pregnancy  
23 following recurrent miscarriage. Study limitations included the fact that the qualitative  
24 study was nested within an RCT feasibility study<sup>20 21</sup> and this was reflected in the choice of  
25 research methods selected. Furthermore, the majority of participants who took part in this  
26 study were of White British ethnicity, mainly due to the study sites in the South of England.  
27 A more varied ethnicity sample may have provided a more diverse and richer insight in to  
28 the cultural effects of recurrent miscarriage.  
29  
30  
31  
32

### 33 Conclusion

34  
35 This study demonstrates that for many women with recurrent miscarriage, the waiting  
36 period of a new pregnancy is a time of great uncertainty and emotional turmoil and one in  
37 which they are likely to require emotional support.  
38

39  
40 Recurrent pregnancy loss has the potential to cause serious psychological effects including  
41 grief, anxiety and depression, and these emotional symptoms can affect every aspect of the  
42 woman's life. Recurrent miscarriage is therefore much more than just a medical condition;  
43 its consequences are more profound and life changing and the provision of supportive care  
44 should be central to the management of women who experience this distressing and  
45 frustrating condition.  
46  
47

48  
49 This study reveals the thoughts and perceptions of women with a history of recurrent  
50 miscarriage during the waiting period of a new pregnancy; the challenge remains for both  
51 clinicians and service providers to develop a service that meets the needs of these women  
52 given the complex and challenging times that the NHS is experiencing. Recent NHS policy<sup>32</sup>  
53 advocates the need to ensure health services are designed around patients, but on a more  
54 sustainable footing. This includes the use of technology and innovation to enable patients to  
55 take a more active role in their health. The next stage of this programme of research plans  
56 to investigate the potential utilisation of technical innovation strategies as a method of  
57 providing much needed support to this vulnerable patient population.  
58  
59  
60

### *Acknowledgements*

The authors would like to thank the women who kindly agreed to participate in this study and the members of the PPI group for their valuable input into this programme of research.

### *Contributors*

SB contributed to the design of the study, was responsible for obtaining ethical approval and liaised with the PPI group for this study. NM, CB, JB, EKR and YC contributed to the design of the study. SB and EKR coded and analysed all the transcripts. All authors were involved in interpretation of the data. SB wrote the first draft of the manuscript and all authors were involved in subsequent revision. All authors approved the final manuscript.

### *Funding*

This study was funded by the National Institute of Health Research, UK (award reference number CDRF-2012-03-004). The study was sponsored by University Hospital Southampton NHS Foundation Trust

### *Competing interests*

None declared

### *Ethical approval*

A favourable opinion was received from National Research Ethics committee, South Central – Hampshire A (13/SC/0506)

### *Provenance and peer review*

Not commissioned; peer reviewed for ethical and funding approval prior to submission

### *Data sharing statement*

This research is part of a PhD study by SB. The PhD will be available via the University of Southampton depository

### *Figure legend/ captions*

Figure 1 – RCT feasibility study of a coping intervention for recurrent miscarriage

Figure 2 – Demographic information of study participants

Figure 3 – Development of basic, organising and global themes using thematic network analysis

## References

1. Simmons RK, Singh G, Maconochie N, et al. Experience of miscarriage in the UK: Qualitative findings from the National Women's Health Study. *Social Science & Medicine* 2006;**63**:1934-46.
2. ESHRE. Recurrent Pregnancy Loss Guideline of the European Society of Human Reproduction and Embryology, 2017.
3. RCOG. The investigation and treatment of couples with recurrent first-trimester and second-trimester miscarriage. 2011.
4. Rai R, Regan L. Seminar: Recurrent miscarriage. *The Lancet* 2006;**368**:601-11.
5. Christiansen OB, Steffensen R, Nielsen HS, et al. Multifactorial Etiology of Recurrent Miscarriage and Its Scientific and Clinical Implications. 2008.
6. Larsen EC, Christiansen OB, Kolte AM, et al. *New insights into mechanisms behind miscarriage*, 2013.
7. Ockhuijsen HDL, van den Hoogen A, Boivin J, et al. Pregnancy After Miscarriage: Balancing Between Loss of Control and Searching for Control. *Research in Nursing and Health* 2014;**37**(4):267-75.
8. Craig M, Tata P, Regan L. Psychiatric morbidity among patients with recurrent miscarriage. *Journal of Psychosomatic Obstetrics and Gynecology* 2002;**23**(3):157-64.
9. Swanson KM, Chen H, Graham JC, et al. Resolution of depression and grief during the first year after miscarriage: a randomized controlled clinical trial of couples-focused interventions. *Journal of Women's Health (15409996)* 2009;**18**(8):1245-57.
10. Musters AM, Koot YE, van den Boogaard NM, et al. Supportive care for women with recurrent miscarriage: a survey to quantify women's preferences. *Human Reproduction* 2013;**28**(2):398-405.
11. Kolte AM, Olsen LR, Mikkelsen EM, et al. Depression and emotional stress is highly prevalent among women with recurrent pregnancy loss. *Human Reproduction (Oxford, England)* 2015;**30**(4):777-82.
12. Magee PL, MacLeod AK, Tata P, et al. Psychological distress in recurrent miscarriage: the role of prospective thinking and role and goal investment. *Journal of Reproductive & Infant Psychology* 2003;**21**(1):35-47.
13. Lok IH, Neugebauer R. Psychological morbidity following miscarriage. *Best Practice & Research Clinical Obstetrics & Gynaecology* 2007;**21**:229-47.
14. Ockhuijsen HDL, Boivin J, van den Hoogen A, et al. Coping after recurrent miscarriage: uncertainty and bracing for the worst. *Journal of Family Planning & Reproductive Health Care* 2013;**39**(4):250-56.
15. Boivin J, Lancaster D. Medical waiting periods: imminence, emotions and coping. *Women's health (London, England)* 2010;**6**(1):59-69.
16. Osuna EE. The psychological cost of waiting. *Journal of Mathematical Psychology* 1985;**29**(1):82-105.
17. Lazarus RS, Folkman S. *Stress, appraisal, and coping / Richard S. Lazarus, Susan Folkman: New York : Springer, 1984., 1984.*
18. Tong S, Kaur A, Walker S, et al. Miscarriage risk for asymptomatic women after a normal first-trimester prenatal visit. *Obstetrics and Gynaecology* 2008;**111**(3):710-14.
19. Hutti MH, Armstrong DS, Myers JA, et al. Grief Intensity, Psychological Well-Being, and the Intimate Partner Relationship in the Subsequent Pregnancy after a Perinatal Loss. *JOGNN: Journal of Obstetric, Gynecologic & Neonatal Nursing* 2015;**44**(1):42.
20. Bailey S, Bailey C, Boivin J, et al. A feasibility study for a randomised controlled trial of the Positive Reappraisal Coping Intervention, a novel supportive technique for recurrent miscarriage. *BMJ open* 2015;**5**:e007322. doi:10.1136/bmjopen-2014-007322.
21. Bailey S. A feasibility and acceptability study and a qualitative process evaluation of a coping intervention for recurrent miscarriage. PhD thesis. University of Southampton, 2018.

- 1
- 2
- 3 22. Amankwaa L. Creating protocols for trustworthiness in qualitative research *Journal of Cultural*
- 4 *Diversity* 2016;**23**(3):121-27.
- 5 23. Attride-Stirling J. Thematic networks: an analytic tool for qualitative research. *Qualitative*
- 6 *Research* 2001;**1**(3):385-405.
- 7 24. Côté-Arsenault D, Dombeck MB. Maternal assignment of fetal personhood to a previous
- 8 pregnancy loss: relationship to anxiety in the current pregnancy. *Health Care for Women*
- 9 *International* 2001;**22**(7):649-65.
- 10 25. Cote-Arsenault D, Donato K. Emotional cushioning in pregnancy after perinatal loss. *Journal of*
- 11 *Reproductive & Infant Psychology* 2011;**29**(1):81-92.
- 12 26. Folkman S. Positive psychological states and coping with severe stress. *Social Science & Medicine*
- 13 1997;**45**(8):1207-21.
- 14 27. Manne S, Ostroff J, Fox K, et al. Cognitive and social processes predicting partner psychological
- 15 adaptation to early stage breast cancer. *British Journal of Health Psychology* 2009;**14**(1):49-
- 16 68.
- 17 28. Lancaster D, Boivin J. A feasibility study of a brief coping intervention (PRCI) for the waiting
- 18 period before a pregnancy test during fertility treatment. *Human Reproduction*
- 19 2008;**23**(10):2299-307.
- 20 29. Bradshaw J. The concept of social need. In: McClachlan G, ed. *Problems and Progress*. Oxford:
- 21 Oxford University Press, 1972.
- 22 30. Meaney S, Corcoran P, Spillane N, et al. Experience of miscarriage: an interpretive
- 23 phenomenological analysis. *BMJ Open* 2017;**7**(e011382).
- 24 31. Norton W, Furber L. An exploration of how women in the UK perceive the provision of care
- 25 received in an early pregnancy assessment unit: an interpretive phenomenological analysis.
- 26 *BMJ open* 2018;**8**(e023579).
- 27 32. NHS England. *Next Steps on the NHS Five Year Forward View*, 2017.
- 28
- 29
- 30
- 31
- 32
- 33
- 34
- 35
- 36
- 37
- 38
- 39
- 40
- 41
- 42
- 43
- 44
- 45
- 46
- 47
- 48
- 49
- 50
- 51
- 52
- 53
- 54
- 55
- 56
- 57
- 58
- 59
- 60

1  
2  
3  
4  
5  
6  
7  
8  
9  
10  
11  
12  
13  
14  
15  
16  
17  
18  
19  
20  
21  
22  
23  
24  
25  
26  
27  
28  
29  
30  
31  
32  
33  
34  
35  
36  
37  
38  
39  
40  
41  
42  
43  
44  
45  
46  
47  
48  
49  
50  
51  
52  
53  
54  
55  
56  
57  
58  
59  
60

| Participant | Ethnic background | Age | Number of miscarriages | Ongoing pregnancy (OP) / Miscarriage (M) at time of interview |
|-------------|-------------------|-----|------------------------|---------------------------------------------------------------|
| 1           | White British     | 38  |                        | 3 OP                                                          |
| 2           | White British     | 37  |                        | 3 OP                                                          |
| 3           | White British     | 42  |                        | 6 M                                                           |
| 4           | White British     | 34  |                        | 4 M                                                           |
| 5           | White British     | 31  |                        | 4 M                                                           |
| 6           | White British     | 39  |                        | 4 M                                                           |
| 7           | White British     | 33  |                        | 4 M                                                           |
| 8           | White British     | 37  |                        | 3 OP                                                          |
| 9           | Asian British     | 29  |                        | 3 OP                                                          |
| 10          | White British     | 38  |                        | 3 OP                                                          |
| 11          | White British     | 34  |                        | 4 OP                                                          |
| 12          | White British     | 36  |                        | 3 OP                                                          |
| 13          | White British     | 40  |                        | 4 M                                                           |
| 14          | White British     | 34  |                        | 3 OP                                                          |

Figure 1: Demographic details of study participants

195x109mm (300 x 300 DPI)

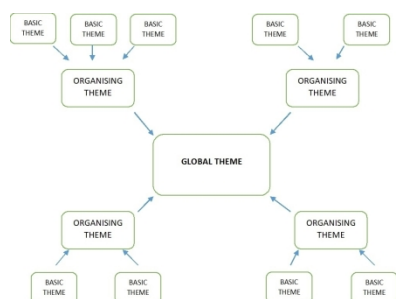

Figure 2: A thematic network map (based on Attride Stirling 2001)

219x123mm (300 x 300 DPI)

| 1. From Basic to Organising to Global Themes           |                                      |                                               |
|--------------------------------------------------------|--------------------------------------|-----------------------------------------------|
| <i>Themes as Basic Themes</i>                          | <i>Organising Themes</i>             | <i>Global Themes</i>                          |
| 1. Uncertainty and fear of unknown                     | 1. Turmoil of emotions               | 1. Hope for the best ... but expect the worst |
| 2. Extreme feelings of anxiety                         |                                      |                                               |
| 3. Betrayed by body - theft of expectations            |                                      |                                               |
| 4. Envy of other pregnant women                        |                                      |                                               |
| 5. Guilt - must be to blame                            |                                      |                                               |
| 6. Increased superstitious tendencies                  |                                      |                                               |
| 7. Mixed emotions after positive pregnancy test        | 2. Preparing for the worst           |                                               |
| 8. Lost expectations                                   |                                      |                                               |
| 9. Lack of hope                                        |                                      |                                               |
| 10. Expecting the worst                                |                                      |                                               |
| 11. Denial of pregnancy                                |                                      |                                               |
| 12. Efforts to remain 'detached' from pregnancy        |                                      |                                               |
| 13. Waiting period divided up into 'bite sized chunks' | 3. Setting of personal milestones    |                                               |
| 14. Take it day-by-day                                 |                                      |                                               |
| 15. Checking for pregnancy symptoms                    | 4. Hypervigilance                    |                                               |
| 16. 'Knicker checking'                                 |                                      |                                               |
| 17. Heightened intuition                               |                                      |                                               |
| 18. Social withdrawal                                  | 5. Social isolation                  |                                               |
| 19. Effect on relationship with family and friends     |                                      |                                               |
| 20. Reluctance to announce news of pregnancy           |                                      |                                               |
| 21. Views on personal social media use                 |                                      |                                               |
| 22. Views on on-line support groups                    |                                      |                                               |
| 23. Value of peer support                              |                                      |                                               |
| 24. Getting used to RM                                 | 6. Adoption of pragmatic approaches  |                                               |
| 25. How to deal with RM                                |                                      |                                               |
| 26. Controlling behaviour                              |                                      |                                               |
| 27. What helped?                                       |                                      |                                               |
| 28. What didn't help?                                  |                                      |                                               |
| 29. Ultra sound scans                                  | 7. Need for professional affirmation |                                               |
| 30. Investigations in to RM                            |                                      |                                               |
| 31. Views on health professionals                      |                                      |                                               |
| 32. Importance of sensitivity of health professionals  |                                      |                                               |

Figure 3: Development of basic, organising and global themes utilising thematic network analysis

106x83mm (300 x 300 DPI)

# Reporting checklist for qualitative study.

Based on the SRQR guidelines.

## Instructions to authors

Complete this checklist by entering the page numbers from your manuscript where readers will find each of the items listed below.

Your article may not currently address all the items on the checklist. Please modify your text to include the missing information. If you are certain that an item does not apply, please write "n/a" and provide a short explanation.

Upload your completed checklist as an extra file when you submit to a journal.

In your methods section, say that you used the SRQR reporting guidelines, and cite them as:

O'Brien BC, Harris IB, Beckman TJ, Reed DA, Cook DA. Standards for reporting qualitative research: a synthesis of recommendations. Acad Med. 2014;89(9):1245-1251.

|    | Reporting Item                                                                                                                                                                                                                       | Page Number |
|----|--------------------------------------------------------------------------------------------------------------------------------------------------------------------------------------------------------------------------------------|-------------|
| #1 | Concise description of the nature and topic of the study identifying the study as qualitative or indicating the approach (e.g. ethnography, grounded theory) or data collection methods (e.g. interview, focus group) is recommended | 1           |
| #2 | Summary of the key elements of the study using the abstract format of the intended publication; typically                                                                                                                            | 1           |



|    |                       |    |                                                           |   |
|----|-----------------------|----|-----------------------------------------------------------|---|
| 1  |                       |    | includes background, purpose, methods, results and        |   |
| 2  |                       |    |                                                           |   |
| 3  |                       |    | conclusions                                               |   |
| 4  |                       |    |                                                           |   |
| 5  |                       |    |                                                           |   |
| 6  | Problem formulation   | #3 | Description and significance of the problem /             | 2 |
| 7  |                       |    |                                                           |   |
| 8  |                       |    | phenomenon studied: review of relevant theory and         |   |
| 9  |                       |    |                                                           |   |
| 10 |                       |    | empirical work; problem statement                         |   |
| 11 |                       |    |                                                           |   |
| 12 |                       |    |                                                           |   |
| 13 | Purpose or research   | #4 | Purpose of the study and specific objectives or           | 3 |
| 14 | question              |    | questions                                                 |   |
| 15 |                       |    |                                                           |   |
| 16 |                       |    |                                                           |   |
| 17 |                       |    |                                                           |   |
| 18 |                       |    |                                                           |   |
| 19 | Qualitative approach  | #5 | Qualitative approach (e.g. ethnography, grounded          | 3 |
| 20 | and research paradigm |    | theory, case study, phenomenology, narrative research)    |   |
| 21 |                       |    | and guiding theory if appropriate; identifying the        |   |
| 22 |                       |    |                                                           |   |
| 23 |                       |    | research paradigm (e.g. postpositivist, constructivist /  |   |
| 24 |                       |    |                                                           |   |
| 25 |                       |    | interpretivist) is also recommended; rationale. The       |   |
| 26 |                       |    |                                                           |   |
| 27 |                       |    | rationale should briefly discuss the justification for    |   |
| 28 |                       |    |                                                           |   |
| 29 |                       |    | choosing that theory, approach, method or technique       |   |
| 30 |                       |    |                                                           |   |
| 31 |                       |    | rather than other options available; the assumptions      |   |
| 32 |                       |    |                                                           |   |
| 33 |                       |    | and limitations implicit in those choices and how those   |   |
| 34 |                       |    |                                                           |   |
| 35 |                       |    | choices influence study conclusions and transferability.  |   |
| 36 |                       |    |                                                           |   |
| 37 |                       |    | As appropriate the rationale for several items might be   |   |
| 38 |                       |    |                                                           |   |
| 39 |                       |    | discussed together.                                       |   |
| 40 |                       |    |                                                           |   |
| 41 |                       |    |                                                           |   |
| 42 |                       |    |                                                           |   |
| 43 |                       |    |                                                           |   |
| 44 |                       |    |                                                           |   |
| 45 |                       |    |                                                           |   |
| 46 | Researcher            | #6 | Researchers' characteristics that may influence the       | 4 |
| 47 | characteristics and   |    | research, including personal attributes, qualifications / |   |
| 48 | reflexivity           |    | experience, relationship with participants, assumptions   |   |
| 49 |                       |    |                                                           |   |
| 50 |                       |    | and / or presuppositions; potential or actual interaction |   |
| 51 |                       |    |                                                           |   |
| 52 |                       |    | between researchers' characteristics and the research     |   |
| 53 |                       |    |                                                           |   |
| 54 |                       |    |                                                           |   |
| 55 |                       |    |                                                           |   |
| 56 |                       |    |                                                           |   |
| 57 |                       |    |                                                           |   |
| 58 |                       |    |                                                           |   |
| 59 |                       |    |                                                           |   |
| 60 |                       |    |                                                           |   |

|    |                           |                                                             |    |
|----|---------------------------|-------------------------------------------------------------|----|
| 1  |                           | questions, approach, methods, results and / or              |    |
| 2  |                           | transferability                                             |    |
| 3  |                           |                                                             |    |
| 4  |                           |                                                             |    |
| 5  |                           |                                                             |    |
| 6  | Context                   | #7 Setting / site and salient contextual factors; rationale | 4  |
| 7  |                           |                                                             |    |
| 8  |                           |                                                             |    |
| 9  | Sampling strategy         | #8 How and why research participants, documents, or         | 4  |
| 10 |                           | events were selected; criteria for deciding when no         |    |
| 11 |                           | further sampling was necessary (e.g. sampling               |    |
| 12 |                           | saturation); rationale                                      |    |
| 13 |                           |                                                             |    |
| 14 |                           |                                                             |    |
| 15 |                           |                                                             |    |
| 16 |                           |                                                             |    |
| 17 |                           |                                                             |    |
| 18 |                           |                                                             |    |
| 19 | Ethical issues pertaining | #9 Documentation of approval by an appropriate ethics       | 12 |
| 20 | to human subjects         | review board and participant consent, or explanation for    |    |
| 21 |                           | lack thereof; other confidentiality and data security       |    |
| 22 |                           | issues                                                      |    |
| 23 |                           |                                                             |    |
| 24 |                           |                                                             |    |
| 25 |                           |                                                             |    |
| 26 |                           |                                                             |    |
| 27 |                           |                                                             |    |
| 28 |                           |                                                             |    |
| 29 | Data collection methods   | #10 Types of data collected; details of data collection     | 4  |
| 30 |                           | procedures including (as appropriate) start and stop        |    |
| 31 |                           | dates of data collection and analysis, iterative process,   |    |
| 32 |                           | triangulation of sources / methods, and modification of     |    |
| 33 |                           | procedures in response to evolving study findings;          |    |
| 34 |                           | rationale                                                   |    |
| 35 |                           |                                                             |    |
| 36 |                           |                                                             |    |
| 37 |                           |                                                             |    |
| 38 |                           |                                                             |    |
| 39 |                           |                                                             |    |
| 40 |                           |                                                             |    |
| 41 |                           |                                                             |    |
| 42 |                           |                                                             |    |
| 43 | Data collection           | #11 Description of instruments (e.g. interview guides,      | 4  |
| 44 | instruments and           | questionnaires) and devices (e.g. audio recorders) used     |    |
| 45 |                           | for data collection; if / how the instruments(s) changed    |    |
| 46 |                           | over the course of the study                                |    |
| 47 | technologies              |                                                             |    |
| 48 |                           |                                                             |    |
| 49 |                           |                                                             |    |
| 50 |                           |                                                             |    |
| 51 |                           |                                                             |    |
| 52 |                           |                                                             |    |
| 53 | Units of study            | #12 Number and relevant characteristics of participants,    | 4  |
| 54 |                           | documents, or events included in the study; level of        |    |
| 55 |                           | participation (could be reported in results)                |    |
| 56 |                           |                                                             |    |
| 57 |                           |                                                             |    |
| 58 |                           |                                                             |    |
| 59 |                           |                                                             |    |
| 60 |                           |                                                             |    |

|    |                         |     |                                                             |      |
|----|-------------------------|-----|-------------------------------------------------------------|------|
| 1  | Data processing         | #13 | Methods for processing data prior to and during             | 5    |
| 2  |                         |     |                                                             |      |
| 3  |                         |     |                                                             |      |
| 4  |                         |     | analysis, including transcription, data entry, data         |      |
| 5  |                         |     |                                                             |      |
| 6  |                         |     | management and security, verification of data integrity,    |      |
| 7  |                         |     |                                                             |      |
| 8  |                         |     | data coding, and anonymisation / deidentification of        |      |
| 9  |                         |     |                                                             |      |
| 10 |                         |     | excerpts                                                    |      |
| 11 |                         |     |                                                             |      |
| 12 |                         |     |                                                             |      |
| 13 | Data analysis           | #14 | Process by which inferences, themes, etc. were              | 5    |
| 14 |                         |     |                                                             |      |
| 15 |                         |     | identified and developed, including the researchers         |      |
| 16 |                         |     |                                                             |      |
| 17 |                         |     | involved in data analysis; usually references a specific    |      |
| 18 |                         |     |                                                             |      |
| 19 |                         |     | paradigm or approach; rationale                             |      |
| 20 |                         |     |                                                             |      |
| 21 |                         |     |                                                             |      |
| 22 |                         |     |                                                             |      |
| 23 | Techniques to enhance   | #15 | Techniques to enhance trustworthiness and credibility       | 5    |
| 24 |                         |     |                                                             |      |
| 25 | trustworthiness         |     | of data analysis (e.g. member checking, audit trail,        |      |
| 26 |                         |     |                                                             |      |
| 27 |                         |     | triangulation); rationale                                   |      |
| 28 |                         |     |                                                             |      |
| 29 |                         |     |                                                             |      |
| 30 |                         |     |                                                             |      |
| 31 | Syntheses and           | #16 | Main findings (e.g. interpretations, inferences, and        | 5-8  |
| 32 |                         |     |                                                             |      |
| 33 | interpretation          |     | themes); might include development of a theory or           |      |
| 34 |                         |     |                                                             |      |
| 35 |                         |     | model, or integration with prior research or theory         |      |
| 36 |                         |     |                                                             |      |
| 37 |                         |     |                                                             |      |
| 38 |                         |     |                                                             |      |
| 39 | Links to empirical data | #17 | Evidence (e.g. quotes, field notes, text excerpts,          | 5-8  |
| 40 |                         |     |                                                             |      |
| 41 |                         |     | photographs) to substantiate analytic findings              |      |
| 42 |                         |     |                                                             |      |
| 43 |                         |     |                                                             |      |
| 44 | Intergration with prior | #18 | Short summary of main findings; explanation of how          | 9-11 |
| 45 |                         |     |                                                             |      |
| 46 | work, implications,     |     | findings and conclusions connect to, support, elaborate     |      |
| 47 |                         |     |                                                             |      |
| 48 | transferability and     |     | on, or challenge conclusions of earlier scholarship;        |      |
| 49 |                         |     |                                                             |      |
| 50 | contribution(s) to the  |     | discussion of scope of application / generalizability;      |      |
| 51 |                         |     |                                                             |      |
| 52 | field                   |     | identification of unique contributions(s) to scholarship in |      |
| 53 |                         |     |                                                             |      |
| 54 |                         |     | a discipline or field                                       |      |
| 55 |                         |     |                                                             |      |
| 56 |                         |     |                                                             |      |
| 57 |                         |     |                                                             |      |
| 58 |                         |     |                                                             |      |
| 59 |                         |     |                                                             |      |
| 60 |                         |     |                                                             |      |

|    |                       |     |                                                          |    |
|----|-----------------------|-----|----------------------------------------------------------|----|
| 1  | Limitations           | #19 | Trustworthiness and limitations of findings              | 2  |
| 2  |                       |     |                                                          |    |
| 3  |                       |     |                                                          |    |
| 4  | Conflicts of interest | #20 | Potential sources of influence of perceived influence on | 12 |
| 5  |                       |     | study conduct and conclusions; how these were            |    |
| 6  |                       |     | managed                                                  |    |
| 7  |                       |     |                                                          |    |
| 8  |                       |     |                                                          |    |
| 9  |                       |     |                                                          |    |
| 10 |                       |     |                                                          |    |
| 11 |                       |     |                                                          |    |
| 12 | Funding               | #21 | Sources of funding and other support; role of funders in | 12 |
| 13 |                       |     | data collection, interpretation and reporting            |    |
| 14 |                       |     |                                                          |    |
| 15 |                       |     |                                                          |    |
| 16 |                       |     |                                                          |    |

17 The SRQR checklist is distributed with permission of Wolters Kluwer © 2014 by the Association of  
18 American Medical Colleges. This checklist was completed on 22. January 2019 using  
19 <https://www.goodreports.org/>, a tool made by the [EQUATOR Network](#) in collaboration with  
20 [Penelope.ai](#)  
21  
22  
23  
24  
25  
26  
27  
28  
29  
30  
31  
32  
33  
34  
35  
36  
37  
38  
39  
40  
41  
42  
43  
44  
45  
46  
47  
48  
49  
50  
51  
52  
53  
54  
55  
56  
57  
58  
59  
60
